# Supplementary material for: The biogeography of red snow microbiomes and their role in melting arctic glaciers
Source: PubMed Central journal article supplement (PMC4917964; doi:10.1038/ncomms11968), 2016-06-22
Supplement: ncomms11968-s1.pdf [file ncomms11968-s1.pdf]

Supplementary Figure 1: PCA of aqueous geochemical parameters

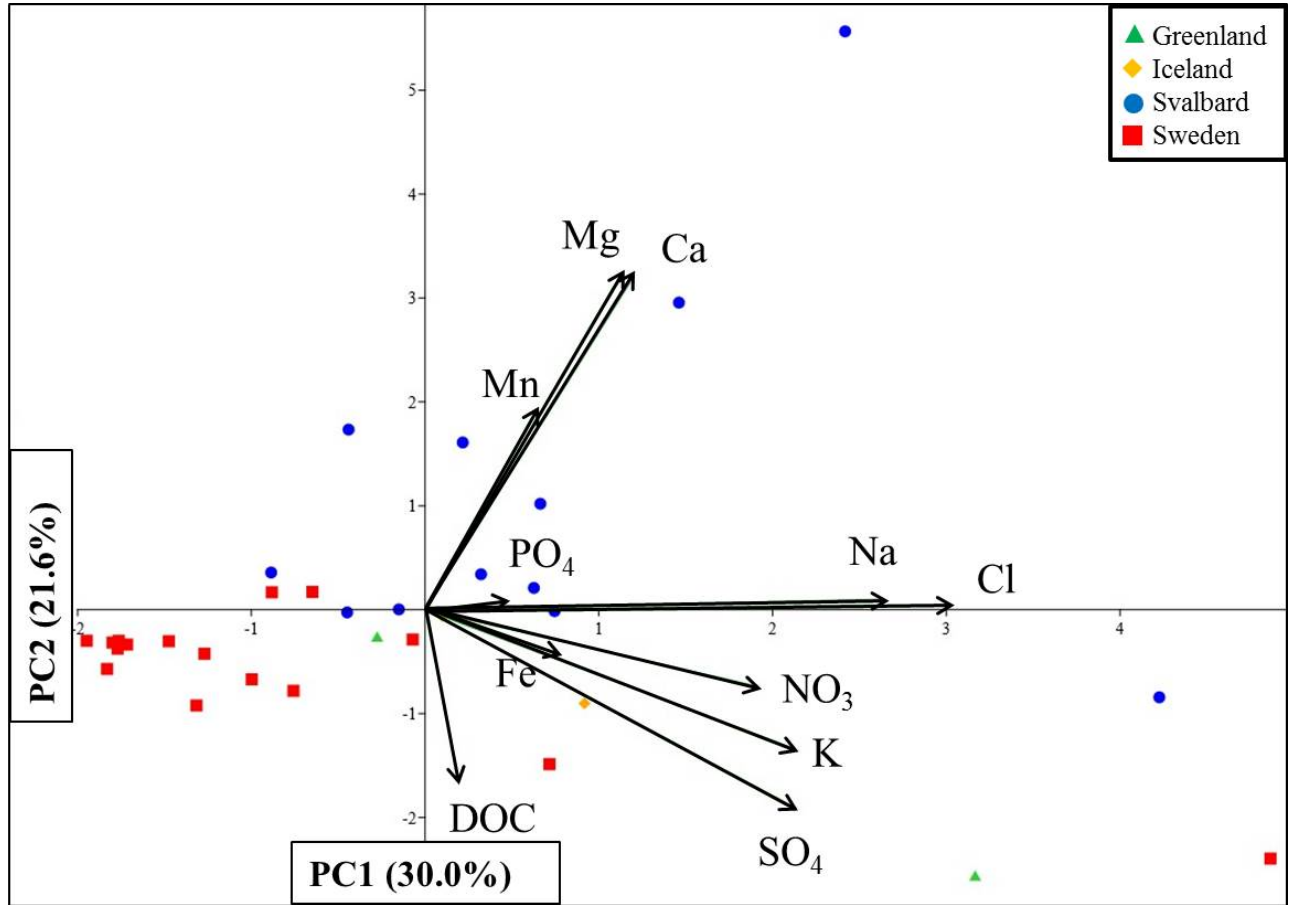

PCA of aqueous geochemical parameters revealing differences between locations. Samples cluster according to locations with Arctic Sweden showing a trend in higher DOC concentrations whereas higher Ca, Cl, Mg, Mn, and Na concentrations are matching the Svalbard samples.

Supplementary Figure 2: CCA for algal species and geochemistry

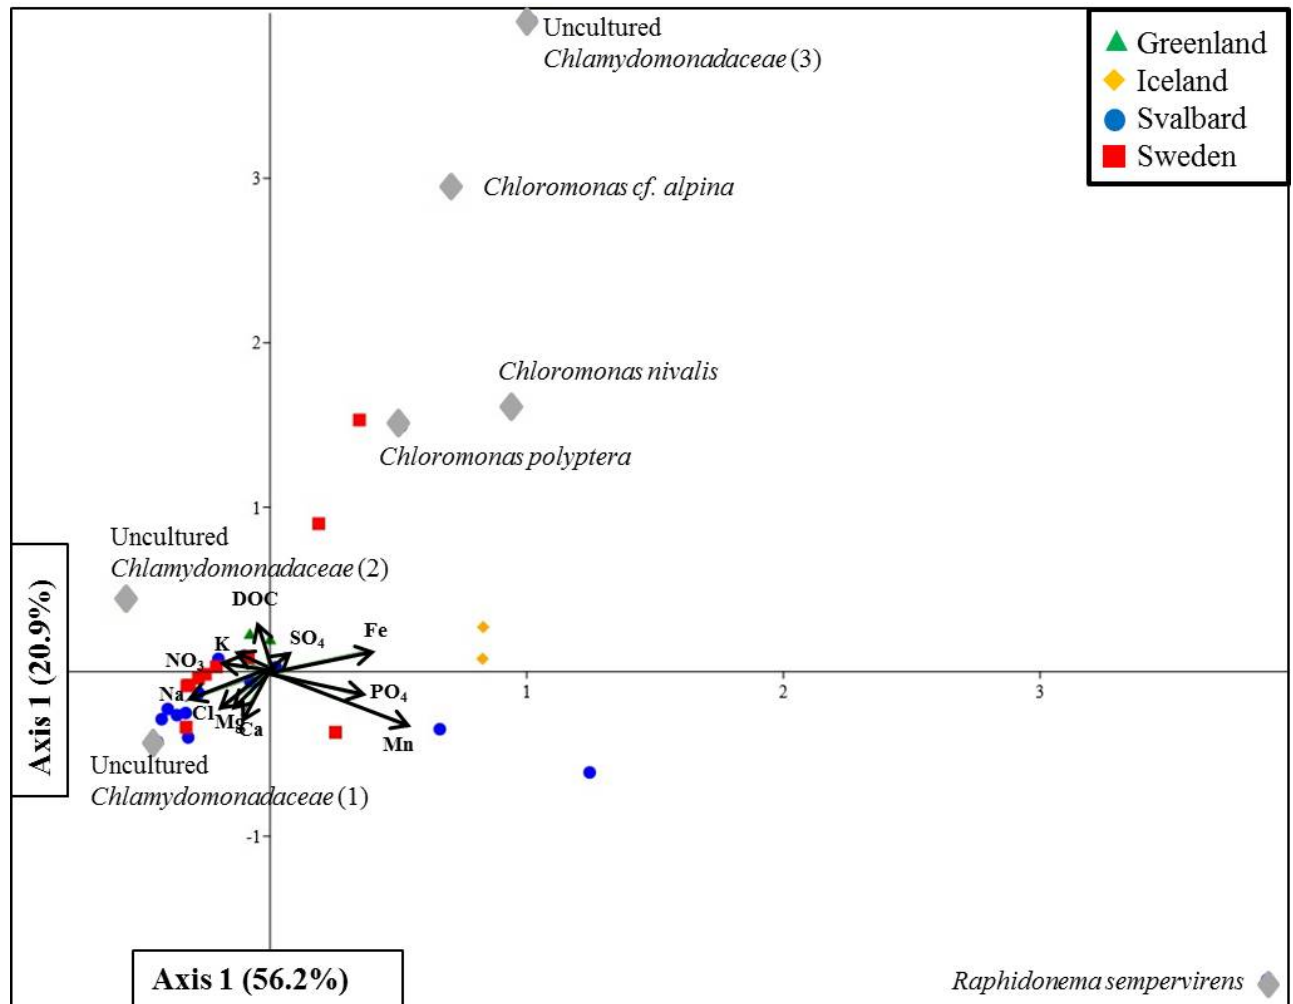

CCA for algal species (grey diamonds) and geochemistry (arrows) showing no clustering of samples and no trends for any of the samples or species with the analysed aqueous geochemical parameters.

Supplementary Figure 3: CCA for bacterial classes and geochemistry

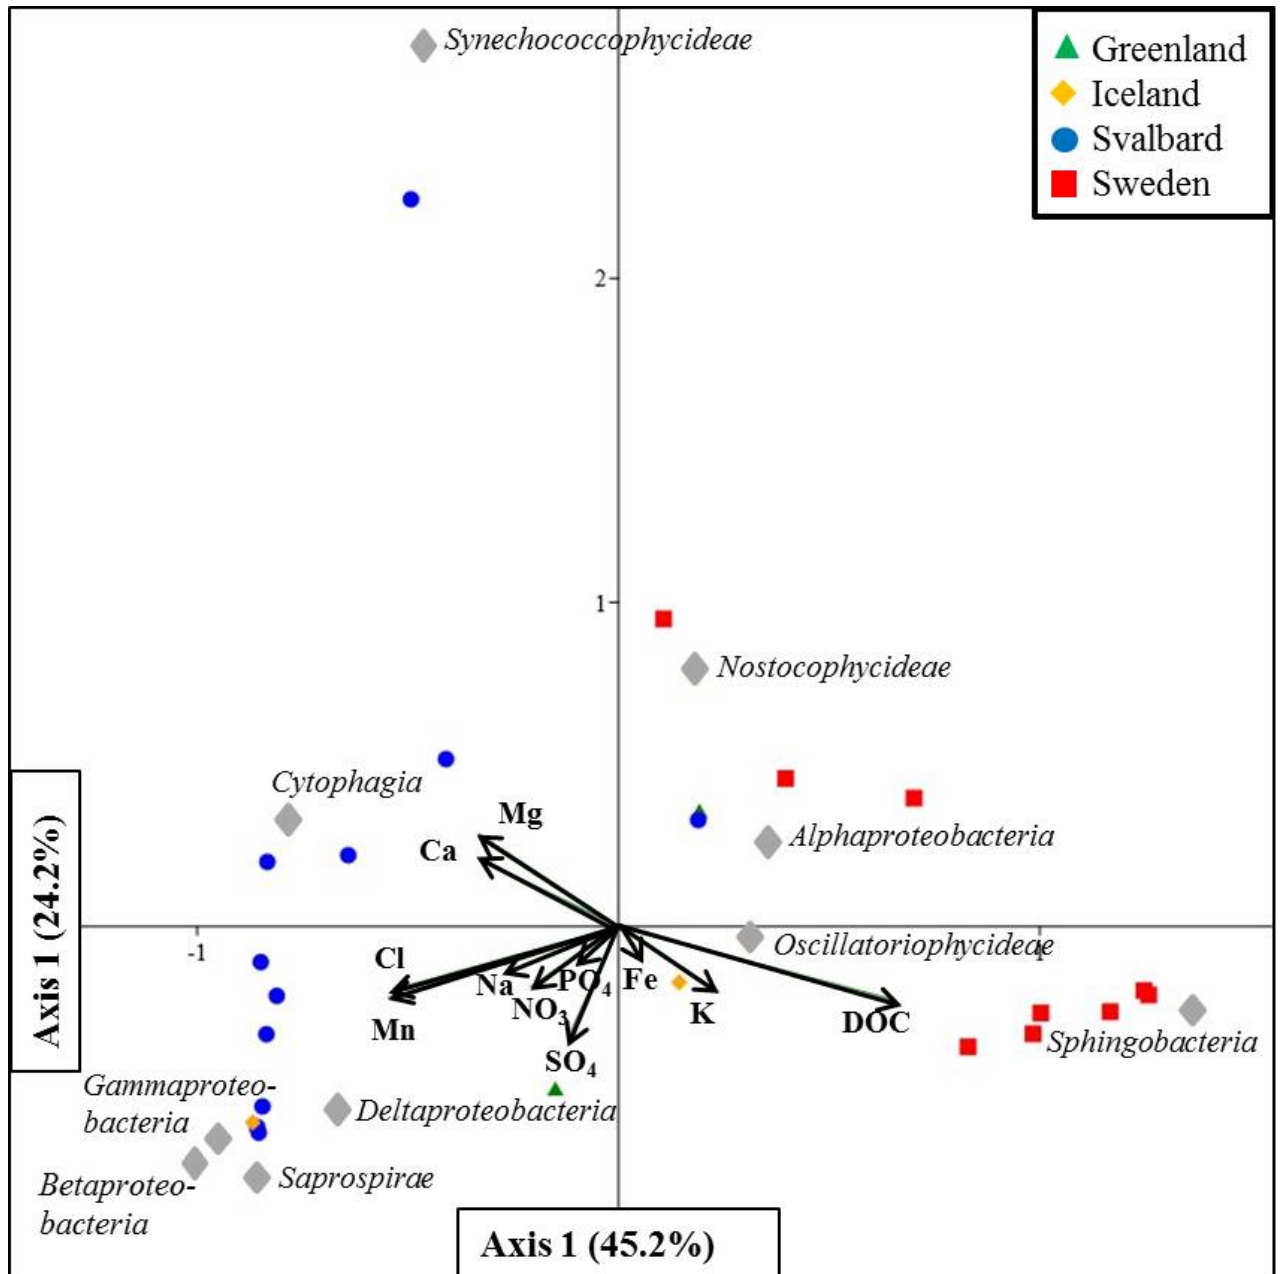

CCA for bacterial classes (grey diamonds) and geochemistry (arrows) showing a clustering of samples according to locations and a positive correlation between *Sphingobacteria* and DOC.

Supplementary Figure 4: Integrated albedo change

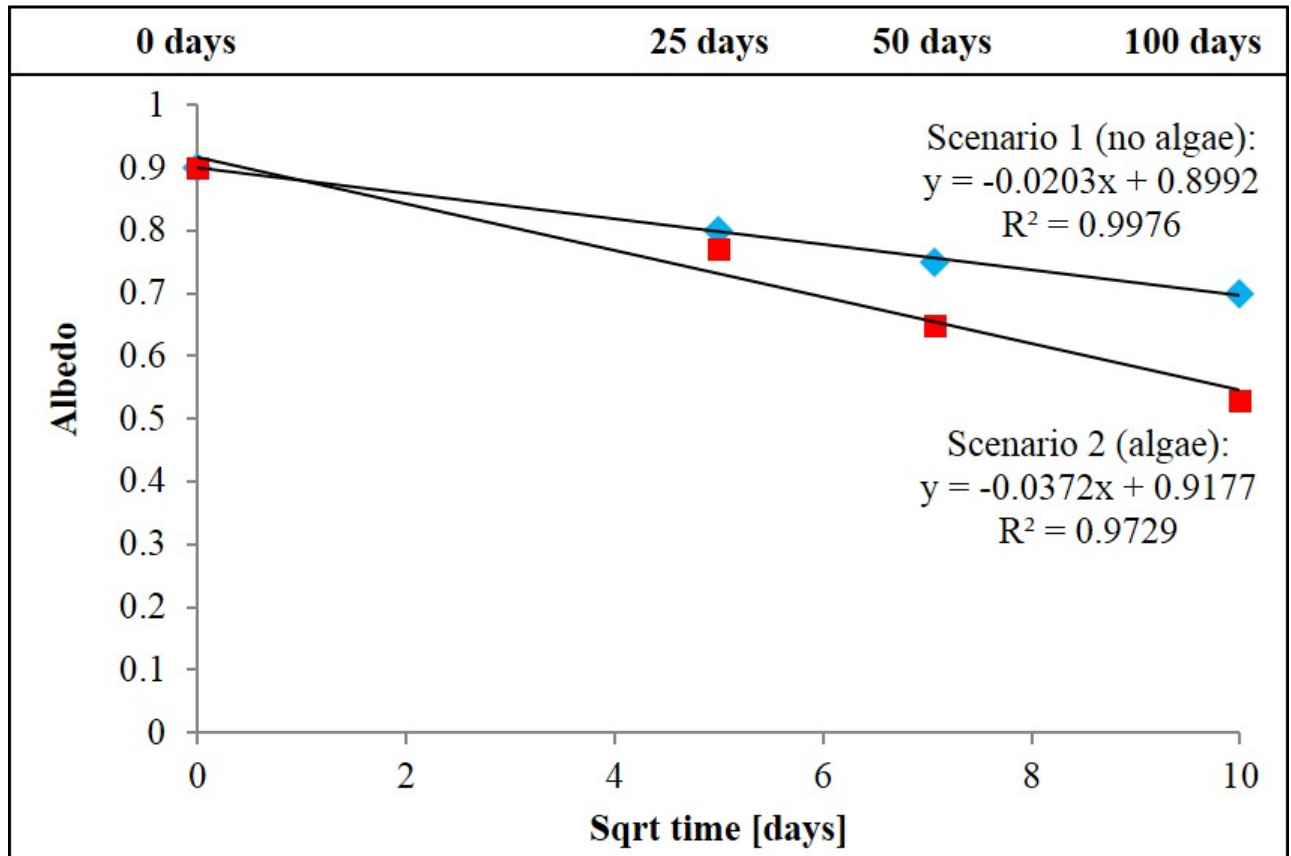

Output from the used one-dimensional moving boundary approach (based on our and literature data; see Table 1 in the main document) with the derived equations for the changes in albedo over 100 days of melting due to purely physical changes (blue diamonds) and due to the blooming of red pigmented algae (red squares). Scenario 1 (blue diamonds) represents a purely physical reduction in albedo values ( $\alpha$ ) due to melt induced changes in snow crystals shape and size, with no input from red pigmented snow algae (dry clean snow  $\rightarrow$  wet clean snow). Scenario 2 (red squares) represents the changes in albedo over the same period, but due to the reduction in albedo caused by the presence of red pigmented snow algae (dry clean snow  $\rightarrow$  red snow). For the origin of the used albedo data as well as the values used in our scenarios see Supplementary Table 1 and Table 1.

Supplementary Figure 5: Sensitivity analysis for integration albedo change fits

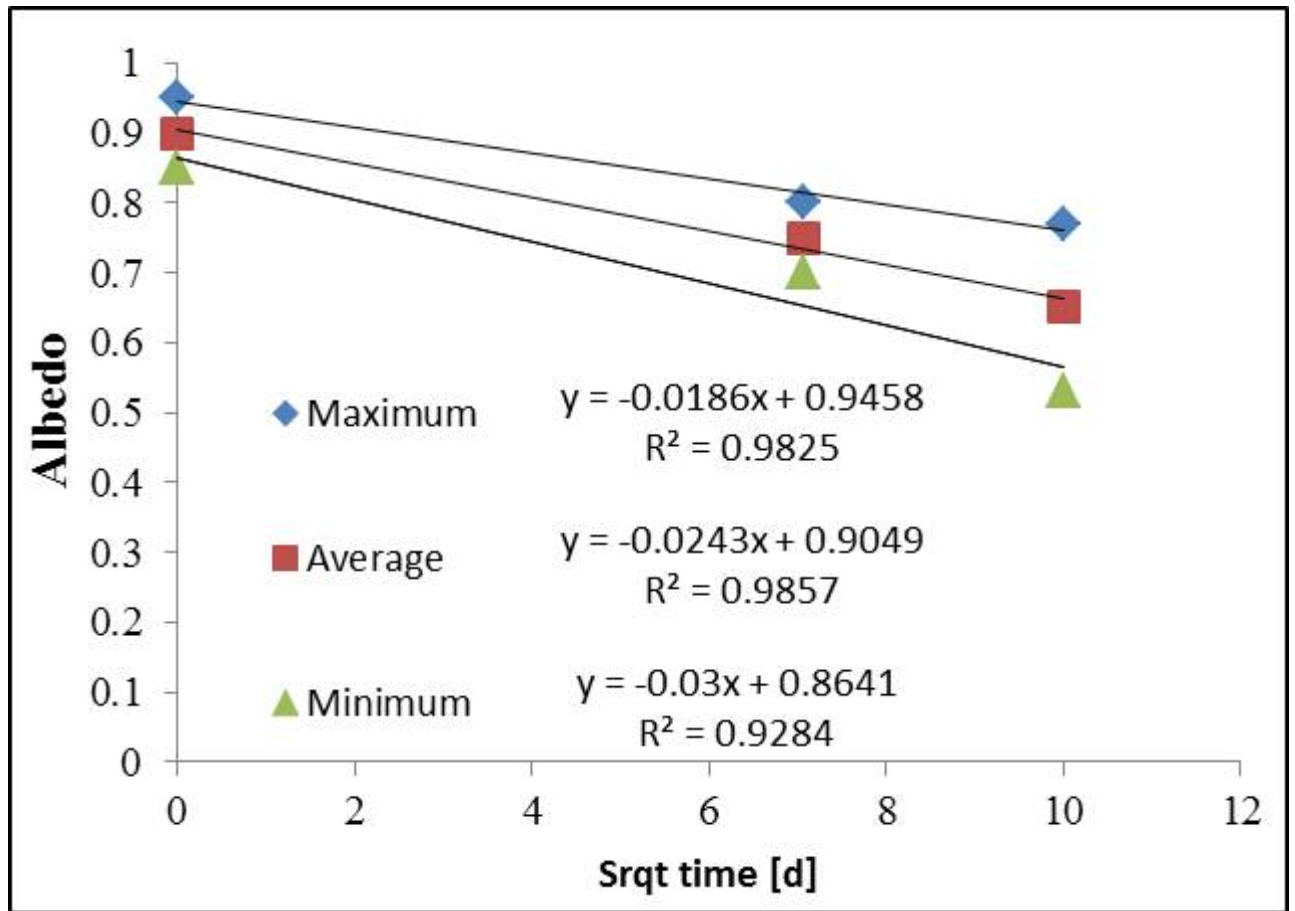

Sensitivity analysis for integrated albedo change fits as based on our and literature data (see Table 1 in the main document and Supplementary Table 1) with equations for maximum, average and minimum values for dry clean snow, wet clean snow and red snow (Table 1). The full sensitivity analysis is provided in the methods section at the end of the manuscript.

Supplementary Figure 6: Rarefaction curves for algal sequences

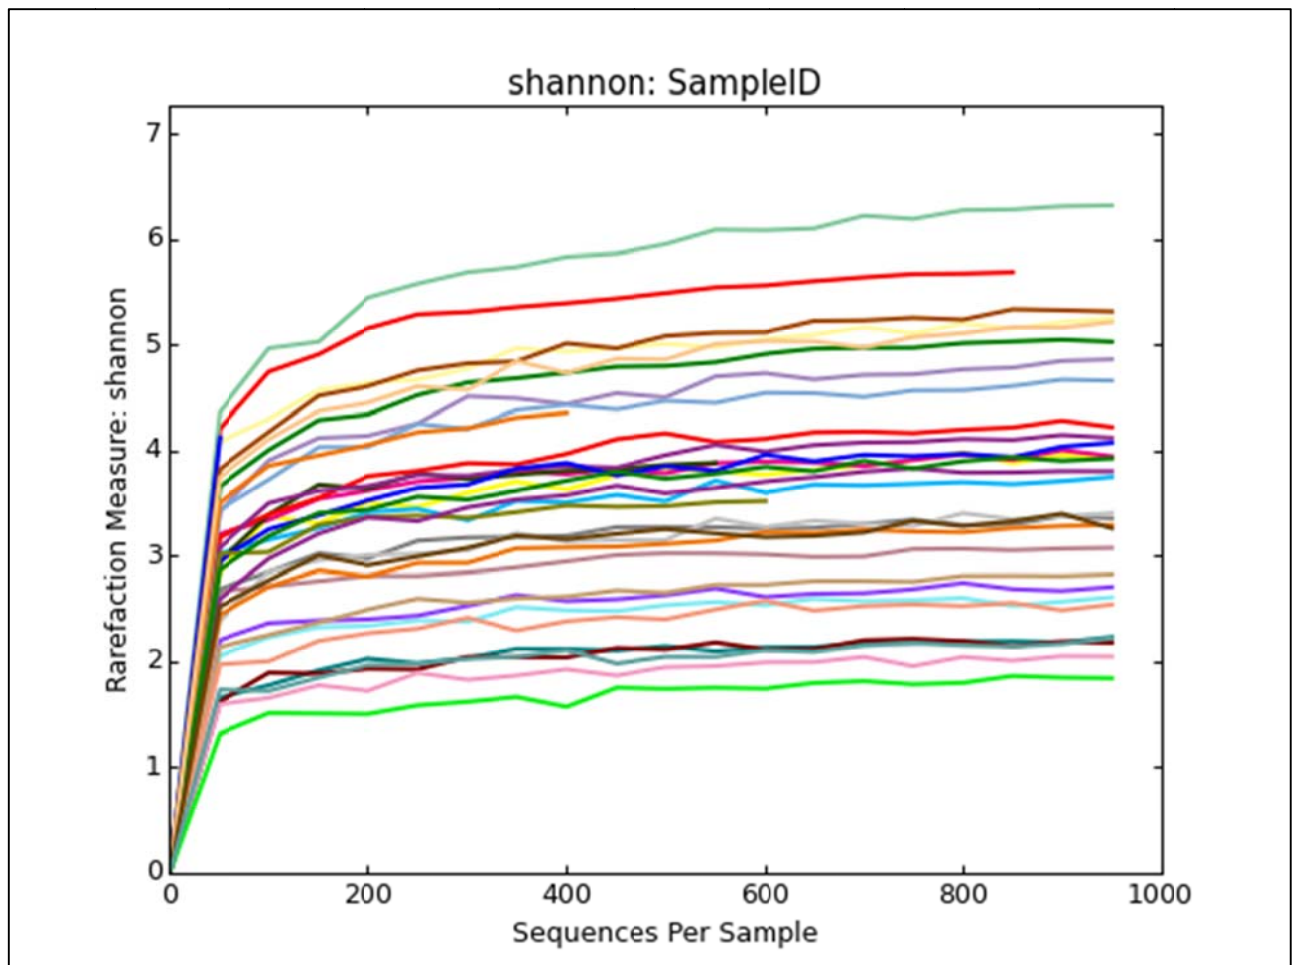

Rarefaction curves for all samples (algal sequences) suggesting a good coverage of the algal diversity. Samples were rarefied to the smallest library size and alpha diversity was estimated using Shannon indices.

### Supplementary Table 1: Sample overview

Overview of samples, locations, coordinates and field measurements for red snow algae samples collected from Svalbard (SVA), Northern Sweden (TAR), Greenland (MIT) and Iceland (ICE). Only a few samples from Greenland and Iceland have been included in this study for the pan-Arctic comparison and many more data from other snow and ice habitat samples can be found in previous publications<sup>1,2</sup>.

| Sample ID               | Location             | Collection date | GPS location [UTM]       | Elev.<br>[m a.s.l.] | pH   | Snow temp.<br>[°C] | PAR<br>[W/m <sup>2</sup> ] | UV-A<br>[W/m <sup>2</sup> ] | UV-B<br>[W/m <sup>2</sup> ] | Albedo |
|-------------------------|----------------------|-----------------|--------------------------|---------------------|------|--------------------|----------------------------|-----------------------------|-----------------------------|--------|
| <b>Svalbard, Norway</b> |                      |                 |                          |                     |      |                    |                            |                             |                             |        |
| SVA-13_2                | Vestre Brøggerbreen  | 20/07/2013      | 33H 0433169 E, 8759838 N | 265                 | 7.03 | 0                  | 48                         |                             |                             | 0.63   |
| SVA-13_4                | Vestre Brøggerbreen  | 20/07/2013      | 33H 0432976 E, 8760004 N | 254                 | 6.10 | 0                  | 39                         |                             |                             | 0.67   |
| SVA-13_10               | Midtre Lovénbreen    | 21/07/2013      | 33H 0436410 E, 8757512 N | 299                 | 6.65 | 0                  | 54                         | 7.49                        | 3.99                        | 0.76   |
| SVA-13_20               | Austre Brøggerbreen  | 24/07/2013      | 33X 0429286 E, 8761458 N | 209                 | 6.38 |                    | 91                         |                             |                             | 0.60   |
| SVA-13_23               | Austre Brøggerbreen  | 24/07/2013      | 33X 0429448 E, 8761568 N | 227                 | 6.27 |                    | 75                         |                             |                             | 0.63   |
| SVA-13_31               | Austre Brøggerbreen  | 24/07/2013      | 33X 0430139 E, 8761706 N | 146                 | 8.07 |                    | 70                         |                             |                             | 0.62   |
| SVA-13_33               | Pedersenbreen        | 27/07/2013      | 33X 0441747 E, 8756068 N | 320                 |      |                    | 22                         | 24.7                        | 1.07                        | 0.55   |
| SVA-13_36               | Pedersenbreen        | 27/07/2013      | 33X 0441609 E, 8756682 N | 262                 |      |                    | 115                        |                             |                             | 0.55   |
| SVA-13_43               | Austre Lovénbreen    | 03/08/2013      | 33X 0439635 E, 8756676 N | 413                 | 6.3  | 0.1                | 182                        | 19.6                        | 0.66                        | 0.66   |
| SVA-13_48               | Austre Lovénbreen    | 03/08/2013      | 33X 0438286 E, 8756948 N | 345                 |      |                    | 36                         |                             |                             | 0.60   |
| SVA-13_54               | Feiringsbreen        | 05/08/2013      | 33X 0446691 E, 8773282 N | 401                 | 5.68 |                    | 88                         | 11.8                        | 0.35                        | 0.51   |
| SVA-13_65               | Midtre Lovénbreen    | 05/08/2013      | 33X 0436693 E, 8759332 N | 151                 |      |                    | 108                        |                             |                             | 0.49   |
| <b>Tarfala, Sweden</b>  |                      |                 |                          |                     |      |                    |                            |                             |                             |        |
| TAR-13_1                | Storglaciären        | 01/07/2013      | 34W 0398931 E, 7533637 N | 1268                | 6.98 | 0                  | 52                         | 8.05                        | 0.08                        | 0.56   |
| TAR-13_5                | Storglaciären        | 01/07/2013      | 34W 0399260 E, 7534131 N | 1221                | 5.56 | 0                  | 30                         |                             |                             | 0.66   |
| TAR-13_8                | Storglaciären        | 03/07/2013      | 34W 0397551 E, 7534187 N | 1412                | 7.23 | 0.1                | 97                         |                             |                             | 0.72   |
| TAR-13_17               | Rabot                | 05/07/2013      | 34W 0394929 E, 7534801 N | 1350                | 6.13 | 0                  | 112                        | 16.5                        | 1.05                        | 0.75   |
| TAR-13_21               | Rabot                | 05/07/2013      | 34W 0394160 E, 7535197 N | 1282                | 5.45 | 0                  | 122                        |                             |                             | 0.73   |
| TAR-13_24               | Rabot                | 05/07/2013      | 34W 0393074 E, 7534485 N | 1165                |      |                    | 95                         |                             |                             | 0.54   |
| TAR-13_27               | Liljetopsrännan      | 06/07/2013      | 34W 0398423 E, 7533989 N | 1119                | 5.41 | 0.2                | 54                         | 11.1                        | 0.4                         | 0.65   |
| TAR-13_28               | Liljetopsrännan      | 06/07/2013      | 34W 0398656 E, 7536883 N | 1209                | 6.35 | 0                  | 51                         |                             |                             | 0.56   |
| TAR-13_30               | SE-Kasskasatjäkkå    | 07/07/2013      | 34W 0399446 E, 7537111 N | 1374                | 0.45 | 0.3                | 123                        | 19.4                        | 2.78                        | 0.77   |
| TAR-13_32               | SE-Kasskasatjäkkå    | 07/07/2013      | 34W 0399458 E, 7536982 N | 1318                | 5.78 | 0                  | 108                        |                             |                             | 0.57   |
| TAR-13_35               | Storglaciären        | 09/07/2013      | 34W 0398849 E, 7534337 N | 1308                | 5.41 | 0                  | 88                         |                             |                             | 0.76   |
| TAR-13_36               | Permanent snow field | 09/07/2013      | 34W 0399453 E, 7534692 N | 1167                | 5.68 | 0                  | 85                         |                             |                             | 0.65   |
| TAR-13_37               | Permanent snow field | 09/07/2013      | 34W 0399376 E, 7534942 N | 1163                | 5.73 | 0.4                | 82                         |                             |                             | 0.62   |
| TAR-13_39               | Permanent snow field | 10/07/2013      | 34W 0400256 E, 7535905 N | 1318                |      |                    | 199                        | 18.4                        | 3.86                        | 0.66   |
| TAR-13_41               | Björling             | 11/07/2013      | 34W 0395764 E, 7532198 N | 1295                | 5.44 | 0                  | 127                        | 20.3                        | 4.49                        | 0.66   |
| TAR-13_42               | Björling             | 11/07/2013      | 34W 0396623 E, 7531127 N | 1156                | 6.1  | 0.3                | 100                        |                             |                             | 0.57   |
| TAR-14_1                | Storglaciären        | 04/07/2014      | 34W 0398031 E, 7533618 N | 1268                | 7.4  | 0.1                |                            |                             |                             |        |
| TAR-14_4                | Storglaciären        | 07/07/2014      | 34W 0398886 E, 7533623 N | 1277                | 7.35 | 0.1                |                            |                             |                             |        |
| TAR-14_5                | Storglaciären        | 07/07/2014      | 34H 0399085 E, 7533632 N | 1247                | 7.78 | 0.3                |                            |                             |                             |        |
| TAR-14_6                | Storglaciären        | 07/07/2014      | 34H 0393734 E, 7535101 N | 1226                | 6.17 | 0.1                |                            |                             |                             |        |
| TAR-14_7                | Rabot                | 09/07/2014      | 34W 0394036 E, 7535053 N | 1326                | 8.13 | 0.1                |                            |                             |                             |        |

|                               |                      |            |                          |      |      |      |     |      |      |    |
|-------------------------------|----------------------|------------|--------------------------|------|------|------|-----|------|------|----|
| <b>TAR-14_10</b>              | Liljetopsrännan      | 10/07/2014 | 34W 0398650 E, 7536880 N | 1215 | 7.51 | 0.1  |     |      |      |    |
| <b>TAR-14_11</b>              | SE-Kasskasatjåkkå    | 10/07/2014 | 34W 0399438 E, 7537029 N | 1340 | 7.14 | 0.1  |     |      |      |    |
| <b>TAR-14_12</b>              | Permanent snow field | 10/07/2014 | 34W 0400194 E, 7535878 N | 1318 | 8.16 | 0.1  |     |      |      |    |
| <b>Mittivakkat, Greenland</b> |                      |            |                          |      |      |      |     |      |      |    |
| <b>MIT-12_7</b>               | Mittivakkat          | 10/07/2012 | 24H 0551567 E, 7285460 N | 155  | 5.67 | 0    | 204 | 28.1 | 1.13 |    |
| <b>MIT-12_19</b>              | Mittivakkat          | 17/07/2012 | 24H 0551778 E, 7286368 N | 150  | 4.68 | 0.73 | 345 | 46.2 | 1.54 | 39 |
| <b>Iceland</b>                |                      |            |                          |      |      |      |     |      |      |    |
| <b>ICE-12_3</b>               | Drangajökull         | 27/07/2012 | 27W 0442125 E, 7334250 N | 196  | 6.15 |      |     |      |      |    |
| <b>ICE-12_4</b>               | Laugafell            | 29/07/2012 | 27W 0632892 E, 7222179 N | 908  | 4.96 |      | 237 | 21.2 | 1.24 | 42 |



**Supplementary Table 2: Bacterial community composition**

Distribution of 97% clustered OTUs aligned and assigned to known bacterial species. Values are the relative abundance of the taxa in percentage of total sequences and figure shows taxa with >0.01% abundance. It is important to note that values are rounded to one digit; therefore the abundance of a taxon with a value of 0 in one sample can range between 0 and 0.04%.

| Phylum<br>Class | <i>Acidobacteria</i>  |                     | <i>Actinobacteria</i> |                       | <i>Bacteroidetes</i> |                       |                         |                    | <i>Chlorobi</i>       | <i>Chloroflexi</i>  |              |                        |
|-----------------|-----------------------|---------------------|-----------------------|-----------------------|----------------------|-----------------------|-------------------------|--------------------|-----------------------|---------------------|--------------|------------------------|
|                 | <i>Acidobacteriia</i> | <i>Solibacteres</i> | <i>Acidimicrobiia</i> | <i>Actinobacteria</i> | <i>Cytophagia</i>    | <i>Flavobacteriia</i> | <i>Sphingobacteriia</i> | <i>Saprospirae</i> | <i>Ignavibacteria</i> | <i>Anaerolineae</i> | <i>C0119</i> | <i>Ktedonobacteria</i> |
| SVA-13_4        | 0                     | 0                   | 0                     | 0.5                   | 37.4                 | 0                     | 0.3                     | 51.2               | 0                     | 0                   | 0            | 0                      |
| SVA-13_10       | 17                    | 0                   | 0                     | 0                     | 9                    | 0                     | 0                       | 3                  | 0                     | 0                   | 0            | 0                      |
| SVA-13_20       | 0                     | 0                   | 0                     | 0                     | 10.6                 | 0                     | 1.5                     | 45.2               | 1.8                   | 0                   | 0            | 0                      |
| SVA-13_23       | 0                     | 0                   | 0                     | 0.3                   | 6.3                  | 4.6                   | 0                       | 1                  | 0                     | 0                   | 0            | 0                      |
| SVA-13_31       | 0                     | 0                   | 0                     | 4.2                   | 11.6                 | 0.4                   | 0                       | 44.9               | 0                     | 0                   | 0            | 0                      |
| SVA-13_33       | 0.4                   | 0                   | 0                     | 2.1                   | 3.9                  | 0                     | 2.8                     | 26.8               | 0                     | 0                   | 0            | 0                      |
| SVA-13_36       | 3.4                   | 0                   | 0                     | 8.4                   | 39                   | 0.5                   | 0.8                     | 1.6                | 0                     | 0                   | 0            | 0                      |
| SVA-13_43       | 0.8                   | 0                   | 0                     | 0.8                   | 12.5                 | 0                     | 0.4                     | 67.3               | 0                     | 0                   | 0            | 0                      |
| SVA-13_48       | 0                     | 0                   | 0                     | 0.6                   | 44.5                 | 0.6                   | 0                       | 19.1               | 0                     | 0                   | 0            | 0                      |
| SVA-13_54       | 0.2                   | 0                   | 0                     | 15.7                  | 3.4                  | 0.5                   | 34.6                    | 3.6                | 0                     | 0                   | 0            | 0                      |
| SVA-13_65       | 0.4                   | 0                   | 0                     | 0.2                   | 5.9                  | 1                     | 0.3                     | 3.7                | 0                     | 0.1                 | 0            | 0                      |
| TAR-13_1        | 0                     | 0                   | 0                     | 0.1                   | 3.6                  | 0                     | 91.1                    | 1.9                | 0                     | 0                   | 0            | 0                      |
| TAR-13_8        | 0.4                   | 0                   | 0                     | 0                     | 0                    | 0                     | 89.3                    | 0                  | 0.4                   | 0                   | 0            | 0                      |
| TAR-13_17       | 0.2                   | 0                   | 0                     | 0                     | 0.8                  | 0                     | 90.7                    | 0.1                | 0                     | 0                   | 0            | 0                      |
| TAR-13_21       | 0                     | 0                   | 0                     | 0                     | 1                    | 0                     | 75.7                    | 22.3               | 0                     | 0                   | 0            | 0                      |
| TAR-13_27       | 0                     | 0                   | 0                     | 0                     | 0.5                  | 0                     | 71.4                    | 0.5                | 5.1                   | 0                   | 0            | 0                      |
| TAR-13_28       | 4.7                   | 0                   | 0                     | 0                     | 0                    | 0                     | 12.5                    | 0                  | 0                     | 0                   | 0            | 0                      |
| TAR-13_30       | 0.2                   | 0                   | 0                     | 0                     | 3.8                  | 0                     | 81.6                    | 3.2                | 0.2                   | 0                   | 0            | 0                      |
| TAR-13_35       | 0.8                   | 0                   | 0                     | 0.1                   | 4.1                  | 0.9                   | 63                      | 4.3                | 0                     | 0                   | 0            | 0                      |
| TAR-13_41       | 0                     | 0                   | 0                     | 0.1                   | 0.5                  | 0                     | 82.1                    | 15.8               | 0.3                   | 0                   | 0            | 0                      |
| TAR-14_1        | 1.1                   | 0                   | 0                     | 4.3                   | 1.2                  | 0                     | 46.3                    | 11.2               | 0                     | 0                   | 0            | 0                      |
| TAR-14_4        | 10.7                  | 0.3                 | 0                     | 0                     | 0                    | 0                     | 0.2                     | 0                  | 0                     | 0.1                 | 0            | 0                      |
| TAR-14_5        | 16.7                  | 0.2                 | 0                     | 0                     | 15                   | 0                     | 1.3                     | 0                  | 0                     | 0                   | 0            | 0                      |
| TAR-14_6        | 0.1                   | 0                   | 0                     | 0.1                   | 1.9                  | 0.1                   | 81.3                    | 2.4                | 0                     | 0                   | 0            | 0                      |
| TAR-14_7        | 17.2                  | 0.3                 | 0                     | 0                     | 0                    | 0.1                   | 1.7                     | 0                  | 0                     | 0                   | 0            | 0                      |
| TAR-14_10       | 17.1                  | 0.7                 | 0                     | 0.1                   | 7.3                  | 0                     | 45.8                    | 1                  | 0                     | 0                   | 0            | 0                      |
| TAR-14_11       | 4.6                   | 0.5                 | 0                     | 0.4                   | 13.6                 | 0                     | 51.8                    | 6.3                | 0                     | 0                   | 0            | 0                      |
| TAR-14_12       | 3.1                   | 0                   | 0                     | 0.3                   | 2.2                  | 0                     | 59.3                    | 0                  | 0                     | 0                   | 0            | 0                      |
| MIT-12_7        | 1.2                   | 0                   | 0                     | 0.3                   | 4.8                  | 0                     | 33.2                    | 12.4               | 0                     | 0                   | 0            | 0                      |
| MIT-12_19       | 0                     | 0                   | 0                     | 1.1                   | 2.9                  | 0                     | 14.6                    | 10.8               | 0                     | 0                   | 0            | 0                      |
| ICE-12_3        | 0.4                   | 0                   | 0                     | 6.0                   | 0.1                  | 0                     | 18.8                    | 24.1               | 0                     | 0                   | 0            | 0                      |
| ICE-12_4        | 0                     | 0                   | 0                     | 2.6                   | 5.4                  | 0                     | 0                       | 28.5               | 0                     | 0                   | 0            | 0                      |

Supplementary Table 2 continued.

| Phylum    | <i>Cyanobacteria</i> |                       |                            |                            | <i>Fibrobacteres</i> | <i>Firmicutes</i> | <i>Gemmatimonadetes</i> | <i>Proteobacteria</i>    |                         |                          |                          | <i>TM7-3</i> | <i>WPS-2</i> | <i>Thermi</i> |
|-----------|----------------------|-----------------------|----------------------------|----------------------------|----------------------|-------------------|-------------------------|--------------------------|-------------------------|--------------------------|--------------------------|--------------|--------------|---------------|
| Class     | Cyano-<br>bacteria   | Nostoco-<br>phycideae | Oscillatorio-<br>phycideae | Synechococco-<br>phycideae | Fibrobacteria        | Clostridia        | Gemmatimonadetes        | Alphaproteo-<br>bacteria | Betaproteo-<br>bacteria | Deltaproteo-<br>bacteria | Gammaproteo-<br>bacteria | TM7-3        | WPS-2        | Deinococci    |
| SVA-13_4  | 0                    | 0.3                   | 0                          | 0.5                        | 0                    | 0                 | 0                       | 0                        | 9.5                     | 0                        | 0.3                      | 0            | 0            | 0             |
| SVA-13_10 | 0                    | 1                     | 17                         | 20                         | 0                    | 2                 | 0                       | 8                        | 22                      | 0                        | 0                        | 0            | 1            | 0             |
| SVA-13_20 | 0                    | 0.6                   | 1.2                        | 1.5                        | 0                    | 0                 | 0                       | 0                        | 30.2                    | 0                        | 7.6                      | 0            | 0            | 0             |
| SVA-13_23 | 0.3                  | 2.9                   | 0.1                        | 77.3                       | 0                    | 1.3               | 0                       | 0.7                      | 4.9                     | 0                        | 0.3                      | 0            | 0            | 0             |
| SVA-13_31 | 0                    | 1.8                   | 0.4                        | 10.2                       | 0                    | 0                 | 0                       | 1.1                      | 25.6                    | 0                        | 0                        | 0            | 0            | 0             |
| SVA-13_33 | 0                    | 0.2                   | 0                          | 0.6                        | 0                    | 0.2               | 0                       | 2.1                      | 60.8                    | 0                        | 0                        | 0            | 0            | 0             |
| SVA-13_36 | 0                    | 0                     | 0                          | 8.2                        | 0                    | 0                 | 0                       | 12                       | 24.3                    | 0.1                      | 0                        | 0.1          | 0            | 1.4           |
| SVA-13_43 | 0                    | 0                     | 0                          | 0                          | 0                    | 0                 | 0                       | 0.8                      | 17.5                    | 0                        | 0                        | 0            | 0            | 0             |
| SVA-13_44 | 0                    | 0                     | 0                          | 0.1                        | 0                    | 0                 | 0                       | 0.8                      | 49.4                    | 0                        | 0                        | 0            | 0            | 0             |
| SVA-13_47 | 0                    | 0                     | 0                          | 43.6                       | 0                    | 0                 | 0.1                     | 11.3                     | 0.6                     | 0.2                      | 0                        | 0.3          | 3.3          | 0             |
| SVA-13_48 | 0                    | 0                     | 0                          | 4.2                        | 0                    | 0                 | 0                       | 0.6                      | 30.4                    | 0                        | 0                        | 0            | 0            | 0             |
| SVA-13_54 | 0                    | 0.2                   | 0                          | 18.5                       | 0                    | 0                 | 0                       | 4.8                      | 18.4                    | 0                        | 0.2                      | 0            | 0            | 0             |
| SVA-13_65 | 0                    | 0.2                   | 0                          | 24.2                       | 0                    | 0.1               | 0                       | 0.9                      | 62.6                    | 0                        | 0.4                      | 0            | 0.1          | 0             |
| TAR-13_1  | 0.1                  | 0                     | 0                          | 0.1                        | 0                    | 0                 | 0                       | 0.1                      | 2.1                     | 0                        | 1                        | 0            | 0            | 0             |
| TAR-13_8  | 0.8                  | 3.1                   | 3.3                        | 0                          | 0                    | 0                 | 0                       | 2.3                      | 0.4                     | 0                        | 0                        | 0            | 0.1          | 0             |
| TAR-13_17 | 0.2                  | 4.8                   | 1.4                        | 0.1                        | 0                    | 0                 | 0                       | 1.3                      | 0.4                     | 0                        | 0                        | 0            | 0            | 0             |
| TAR-13_21 | 0.1                  | 0                     | 0                          | 0.1                        | 0                    | 0                 | 0                       | 0.1                      | 0.3                     | 0                        | 0.2                      | 0            | 0            | 0             |
| TAR-13_27 | 0                    | 4.3                   | 0.8                        | 0.5                        | 0                    | 0                 | 0                       | 6.6                      | 0.3                     | 0                        | 10                       | 0            | 0            | 0             |
| TAR-13_28 | 1.6                  | 20.3                  | 4.7                        | 6.3                        | 0                    | 0                 | 0                       | 50                       | 0                       | 0                        | 0                        | 0            | 0            | 0             |
| TAR-13_30 | 0.7                  | 1.1                   | 0.9                        | 0.1                        | 0                    | 0                 | 0                       | 1.1                      | 7                       | 0                        | 0.2                      | 0            | 0            | 0             |
| TAR-13_35 | 0                    | 3                     | 0.4                        | 20.6                       | 0                    | 0.2               | 0                       | 1                        | 1.3                     | 0                        | 0.4                      | 0            | 0            | 0             |
| TAR-13_41 | 0                    | 0.2                   | 0.2                        | 0.2                        | 0                    | 0                 | 0                       | 0.5                      | 0.1                     | 0                        | 0                        | 0            | 0            | 0             |
| TAR-14_1  | 0                    | 0.4                   | 0.4                        | 1.8                        | 0                    | 0                 | 0                       | 18.7                     | 14.4                    | 0                        | 0.2                      | 0            | 0            | 0             |
| TAR-14_4  | 0.6                  | 38.6                  | 30                         | 5                          | 0                    | 0                 | 0                       | 13.9                     | 0.5                     | 0                        | 0                        | 0            | 0            | 0             |
| TAR-14_5  | 3                    | 12.7                  | 15.5                       | 1.9                        | 0                    | 0                 | 0                       | 32.2                     | 1.3                     | 0                        | 0                        | 0            | 0.2          | 0             |
| TAR-14_6  | 0                    | 0.1                   | 0.1                        | 10.2                       | 0                    | 0                 | 0                       | 2.1                      | 1.1                     | 0                        | 0.5                      | 0            | 0            | 0             |
| TAR-14_7  | 3.1                  | 42.8                  | 2.5                        | 1.8                        | 0                    | 0                 | 0                       | 26.1                     | 4.4                     | 0                        | 0                        | 0            | 0.1          | 0             |
| TAR-14_10 | 0.2                  | 0.7                   | 0.3                        | 0.5                        | 0                    | 0                 | 0                       | 8.8                      | 16.9                    | 0                        | 0.4                      | 0            | 0.2          | 0             |
| TAR-14_11 | 0                    | 0.1                   | 0.2                        | 0.1                        | 0                    | 0                 | 0                       | 4.4                      | 4.2                     | 0                        | 13.8                     | 0            | 0.2          | 0             |
| TAR-14_12 | 0                    | 0.6                   | 0                          | 16.7                       | 0                    | 0                 | 0                       | 17                       | 0.3                     | 0                        | 0.6                      | 0            | 0            | 0             |
| MIT-12_7  | 0                    | 0.6                   | 0.3                        | 0                          | 0                    | 0                 | 0                       | 1.2                      | 45.3                    | 0                        | 0.6                      | 0            | 0            | 0             |
| MIT-12_19 | 0                    | 50.2                  | 7                          | 2.5                        | 0                    | 0                 | 0                       | 8.2                      | 2.7                     | 0                        | 0                        | 0            | 0            | 0             |
| ICE-12_3  | 0                    | 0                     | 0                          | 0.5                        | 0                    | 0                 | 0.1                     | 42.0                     | 4.9                     | 0                        | 1.3                      | 0            | 0.9          | 0             |
| ICE-12_4  | 0                    | 0.2                   | 0                          | 0.5                        | 0                    | 0                 | 0.5                     | 5.4                      | 56.2                    | 0                        | 0                        | 0            | 0            | 0             |

### Supplementary Table 3: Measured average values and statistics of all analyses

Statistical analysis of all biological and geochemical results analysed by one-way ANOVA and post-hoc Tukey's test to reveal significant differences between the red snow samples of the sampled geographic locations Svalbard (SVA), Northern Sweden (TAR), Greenland (MIT) and Iceland (ICE). Table shows mean values for each geographic location with respective standard deviations and p-values for the overall significance of the differences between all locations as well as post-hoc pair-wise comparison between two locations (e.g., SVA x TAR). Results with p-values of <0.05 were considered to be significant and are in bold, results with p-values <0.01 were considered to be highly significant and are also underlined.

|                                              | All locations           | SVA Measured average values | SVA x TAR p value       | TAR Measured average values | TAR x MIT p value   | MIT Measured average values | MIT x SVA p value | ICE Measured average values | ICE x SVA p value | ICE x TAR p value | ICE x MIT p value |
|----------------------------------------------|-------------------------|-----------------------------|-------------------------|-----------------------------|---------------------|-----------------------------|-------------------|-----------------------------|-------------------|-------------------|-------------------|
| <b>Algae</b>                                 |                         |                             |                         |                             |                     |                             |                   |                             |                   |                   |                   |
| <i>Chloromonas alpina</i> [%]                | 0.858                   | 0.48 ± 0.64                 | 0.870                   | 1.22 ± 3.42                 | 0.938               | 0.12 ± 0.16                 | 0.998             | 0.93 ± 1.05                 | 0.996             | 0.999             | 0.999             |
| <i>Chloromonas nivalis</i> [%]               | <b><u>0.010</u></b>     | 3.07 ± 4.25                 | 0.790                   | 4.56 ± 3.80                 | 0.057               | 12.99 ± 6.75                | <b>0.022</b>      | 10.78 ± 5.81                | 0.100             | 0.220             | 0.952             |
| <i>Chloromonas polyptera</i> [%]             | 0.190                   | 9.63 ± 6.24                 | 0.601                   | 14.47 ± 12.62               | 0.970               | 17.86 ± 7.57                | 0.715             | 25.59 ± 3.20                | 0.191             | 0.474             | 0.871             |
| <i>Raphidonema sempervirens</i> [%]          | 0.095                   | 5.89 ± 11.06                | 0.758                   | 2.81 ± 5.87                 | 0.994               | 1.23 ± 1.74                 | 0.878             | 18.32 ± 2.34                | 0.215             | 0.077             | 0.181             |
| Uncultured <i>Chlamydomonadaceae</i> (a) [%] | <b>0.030</b>            | 74.91 ± 14.84               | 0.590                   | 67.62 ± 16.06               | 0.961               | 62.12 ± 1.47                | 0.685             | 38.92 ± 6.24                | <b>0.020</b>      | 0.075             | 0.426             |
| Uncultured <i>Chlamydomonadaceae</i> (b) [%] | 0.322                   | 4.83 ± 3.44                 | 0.998                   | 5.09 ± 3.90                 | 1.000               | 4.97 ± 0.88                 | 1.000             | 0 ± 0                       | 0.311             | 0.254             | 0.518             |
| <b>Bacteria</b>                              |                         |                             |                         |                             |                     |                             |                   |                             |                   |                   |                   |
| <i>Bacteroidetes</i> [%]                     |                         |                             |                         |                             |                     |                             |                   |                             |                   |                   |                   |
| <i>Sphingobacteria</i> [%]                   | <b><u>&lt;0.001</u></b> | 3.68 ± 10.29                | <b><u>&lt;0.001</u></b> | 60.20 ± 28.56               | 0.159               | 23.94 ± 13.15               | 0.641             | 9.42 ± 13.31                | 0.987             | 0.026             | 0.913             |
| <i>Saprospirae</i> [%]                       | <b>0.023</b>            | 24.31 ± 24.15               | <b>0.020</b>            | 4.57 ± 6.77                 | 0.933               | 11.62 ± 1.1                 | 0.725             | 26.28 ± 3.1                 | 0.998             | 0.284             | 0.79              |
| <i>Cytophagia</i> [%]                        | 0.059                   | 16.72 ± 15.5                | 0.060                   | 5.24 ± 6.90                 | 0.998               | 3.84 ± 1.4                  | 0.430             | 2.74 ± 3.78                 | 0.359             | 0.990             | 1                 |
| <i>Cyanobacteria</i> [%]                     |                         |                             |                         |                             |                     |                             |                   |                             |                   |                   |                   |
| <i>Nostocophycideae</i> [%]                  | <b><u>0.005</u></b>     | 0.64 ± 0.92                 | 0.826                   | 3.39 ± 5.73                 | <b><u>0.006</u></b> | 25.40 ± 35.07               | 0.003             | 0.12 ± 0.17                 | 1.000             | 0.949             | 0.021             |
| <i>Oscillatoriohycideae</i> [%]              | 0.872                   | 1.69 ± 5.09                 | 1.000                   | 1.87 ± 4.00                 | 0.948               | 3.67 ± 4.76                 | 0.937             | 0 ± 0                       | 0.959             | 0.942             | 0.839             |
| <i>Synechococcophycideae</i> [%]             | 0.384                   | 15.02 ± 22.40               | 0.497                   | 6.14 ± 10.04                | 0.976               | 1.24 ± 1.75                 | 0.669             | 0.49 ± 0.03                 | 0.631             | 0.964             | 1                 |
| <i>Proteobacteria</i> [%]                    |                         |                             |                         |                             |                     |                             |                   |                             |                   |                   |                   |
| <i>Alphaproteobacteria</i> [%]               | 0.144                   | 2.82 ± 3.90                 | 0.489                   | 9.67 ± 14.42                | 0.946               | 4.69 ± 4.92                 | 0.997             | 23.73 ± 25.90               | 0.133             | 0.422             | 0.405             |
| <i>Betaproteobacteria</i> [%]                | <b><u>0.002</u></b>     | 27.84 ± 18.48               | <b><u>0.002</u></b>     | 3.36 ± 5.36                 | 0.297               | 23.99 ± 30.17               | 0.987             | 30.57 ± 36.31               | 0.995             | 0.108             | 0.973             |
| <b>Diversity</b>                             |                         |                             |                         |                             |                     |                             |                   |                             |                   |                   |                   |
| Shannon eukaryotes                           | 0.103                   | 4.51 ± 1.29                 | 0.964                   | 4.66 ± 0.84                 | 0.230               | 6.13 ± 0.02                 | 0.166             | 5.79 ± 0.33                 | 0.355             | 0.463             | 0.985             |
| Shannon algae                                | 0.126                   | 3.06 ± 1.17                 | 0.847                   | 3.34 ± 0.82                 | 0.536               | 4.27 ± 0.24                 | 0.331             | 4.49 ± 0.02                 | 0.204             | 0.362             | 0.996             |
| Shannon bacteria                             | 0.130                   | 5.67 ± 1.04                 | 0.191                   | 4.95 ± 1.00                 | 0.309               | 6.19 ± 0.38                 | 0.902             | 5.20 ± 0.10                 | 0.923             | 0.974             | 0.748             |

---

**Solids (C,N,P,S)**

|                       |                  |               |                  |               |
|-----------------------|------------------|---------------|------------------|---------------|
| TC [%]                | <b>0.007</b>     | 5.4 ± 4.4     | <b>0.007</b>     | 12.4 ± 7.2    |
| TN [%]                | <b>0.047</b>     | 0.3 ± 0.2     | <b>0.047</b>     | 0.6 ± 0.4     |
| TS [%]                | <b>&lt;0.001</b> | 0.12 ± 0.03   | <b>&lt;0.001</b> | 0.07 ± 0.02   |
| TP [%]                | 0.153            | 0.07 ± 0.03   | 0.153            | 0.06 ± 0.01   |
| C/N [ ]               | <b>0.009</b>     | 16 ± 3        | <b>0.009</b>     | 21 ± 6        |
| C/P [ ]               | <b>&lt;0.001</b> | 65 ± 31       | <b>&lt;0.001</b> | 186 ± 89      |
| N/P [ ]               | <b>0.001</b>     | 4 ± 2         | <b>0.001</b>     | 8 ± 3         |
| d <sup>15</sup> N [‰] | 0.582            | -4.77 ± 2.41  | 0.582            | -4.30 ± 1.84  |
| d <sup>13</sup> C [‰] | <b>0.033</b>     | -27.76 ± 1.52 | <b>0.033</b>     | -25.70 ± 2.02 |

**Metabolites**

|                                 |       |        |       |         |
|---------------------------------|-------|--------|-------|---------|
| Secondary carotenoids [%]       | 0.722 | 80 ± 7 | 0.722 | 77 ± 19 |
| Saturated fatty acids [%]       | 0.218 | 32 ± 5 | 0.218 | 37 ± 14 |
| Monounsaturated fatty acids [%] | 0.173 | 16 ± 5 | 0.173 | 13 ± 4  |
| Polyunsaturated fatty acids [%] | 0.449 | 50 ± 8 | 0.449 | 46 ± 13 |

**Biomass**

|                                            |       |                 |       |                 |
|--------------------------------------------|-------|-----------------|-------|-----------------|
| Cell counts [mL <sup>-1</sup> ]            | 0.083 | 43,558 ± 50,308 | 0.083 | 12,121 ± 10,552 |
| Cell volume [μm <sup>3</sup> ]             | 0.305 | 2,044 ± 1,342   | 0.305 | 2,859 ± 1,381   |
| Biomass [mm <sup>3</sup> L <sup>-1</sup> ] | 0.263 | 35 ± 20         | 0.263 | 20 ± 15         |

**Aqueous**

|                       |                  |             |                  |             |              |           |              |                  |                  |                  |       |
|-----------------------|------------------|-------------|------------------|-------------|--------------|-----------|--------------|------------------|------------------|------------------|-------|
| DOC [μM]              | <b>&lt;0.001</b> | 36 ± 13     | <b>&lt;0.001</b> | 189 ± 90    |              |           |              |                  |                  |                  |       |
| PO <sub>4</sub> [uM]  | 0.736            | 0.77 ± 1.71 | 0.736            | 0.54 ± 1.08 |              |           |              |                  |                  |                  |       |
| NO <sub>3</sub> [ppm] | 0.399            | 1008 ± 1986 | 0.414            | 236 ± 623   | 0.996        | 27 ± 37   | 0.760        | <b>&lt;0.001</b> | 0.745            | 0.995            | 1     |
| SO <sub>4</sub> [ppm] | <b>0.013</b>     | 13 ± 46     | 0.981            | 17 ± 49     | <b>0.007</b> | 197 ± 278 | <b>0.007</b> | 91 ± 128         | 0.522            | 0.549            | 0.482 |
| Ca [ppb]              | 0.121            | 381 ± 588   | 0.106            | 45 ± 66     | 1.000        | 19 ± 1    | 0.583        | 24 ± 3           | 0.595            | 1                | 1     |
| Fe [ppb]              | <b>&lt;0.001</b> | 1.9 ± 1.0   | 0.983            | 1.6 ± 1.0   | 0.175        | 5.0 ± 1.4 | 0.256        | 10 ± 10          | <b>&lt;0.001</b> | <b>&lt;0.001</b> | 0.110 |
| K [ppb]               | 0.395            | 41 ± 20     | 0.583            | 77 ± 92     | 0.851        | 121 ± 129 | 0.492        | 41 ± 4           | 1.000            | 0.913            | 0.695 |
| Mg [ppb]              | 0.116            | 125 ± 206   | 0.092            | 7 ± 4       | 1.000        | 5 ± 3     | 0.621        | 39 ± 36          | 0.665            | 1                | 1     |
| Mn [ppb]              | <b>0.008</b>     | 3.7 ± 3.9   | <b>0.005</b>     | 0.3 ± 0.3   | 0.977        | 1 ± 0     | 0.470        | 0.7 ± 1.0        | 0.378            | 0.995            | 0.999 |

---

### Supplementary Table 4: Algal community composition

Distribution of 97% clustered OTUs aligned and assigned to *Archaeplastida* (green algae). Values are the relative abundance of the taxa in percentage of total sequences and table shows taxa with OTUs of a minimum total observation count of 0.1%. It is important to note that values are rounded to one digit; therefore the abundance of a taxon with a value of 0 in one sample can range between 0 and 0.04%.

| Species   | <i>Ancylonema nordenskiöldii</i> | <i>Chloromonas cf. alpina</i><br>AF514403 | <i>Chlamydomonas cf. proboscigera</i> | <i>Chloromonas nivalis</i><br>AF514409 | <i>Chloromonas polyptera</i><br>JQ790556 | <i>Chloromonas spec. CCCryo 273-06</i> | <i>Chloromonas tughillensis</i> | <i>Microglena polar subclade Chlamydo-Monas</i><br>EF537906 | <i>Prototheca cutis</i> | <i>Raphidonema semper-virens</i><br>AJ309939 | <i>Trebouxia usneae</i> | Uncultured <i>Chlamydomonadaceae</i> (1)<br>GU117577 | Uncultured <i>Chlamydomonadaceae</i> (2)<br>GU117576 | Uncultured <i>Chlamydomonadaceae</i> (3)<br>GU117575 |
|-----------|----------------------------------|-------------------------------------------|---------------------------------------|----------------------------------------|------------------------------------------|----------------------------------------|---------------------------------|-------------------------------------------------------------|-------------------------|----------------------------------------------|-------------------------|------------------------------------------------------|------------------------------------------------------|------------------------------------------------------|
| SVA-13_2  | 0                                | 0.1                                       | 0                                     | 1.8                                    | 22.5                                     | 0                                      | 0                               | 0                                                           | 0                       | 0                                            | 0.2                     | 72.3                                                 | 3                                                    | 0.2                                                  |
| SVA-13_4  | 0                                | 0.8                                       | 0                                     | 0.7                                    | 0.9                                      | 0                                      | 0.9                             | 0.1                                                         | 0                       | 0                                            | 0                       | 87.8                                                 | 8.8                                                  | 0                                                    |
| SVA-13_10 | 0                                | 0                                         | 0                                     | 0.2                                    | 5.3                                      | 0                                      | 0                               | 0                                                           | 0                       | 0                                            | 0                       | 83.8                                                 | 10.7                                                 | 0.1                                                  |
| SVA-13_20 | 0                                | 0                                         | 0                                     | 14                                     | 8.8                                      | 0                                      | 0.4                             | 0                                                           | 0                       | 1.7                                          | 0                       | 65                                                   | 10.1                                                 | 0                                                    |
| SVA-13_23 | 0                                | 0                                         | 0                                     | 0.6                                    | 6.5                                      | 0                                      | 0                               | 0                                                           | 0                       | 0.2                                          | 0                       | 89.9                                                 | 2.6                                                  | 0.1                                                  |
| SVA-13_31 | 0                                | 0                                         | 0                                     | 2.7                                    | 5.8                                      | 0                                      | 0                               | 0                                                           | 0.3                     | 0.5                                          | 0                       | 88.9                                                 | 1.8                                                  | 0                                                    |
| SVA-13_33 | 0                                | 1.9                                       | 0                                     | 9.3                                    | 10.8                                     | 0.3                                    | 0                               | 0                                                           | 0                       | 5.1                                          | 0                       | 65.2                                                 | 7.6                                                  | 0                                                    |
| SVA-13_36 | 8.6                              | 0.3                                       | 0.1                                   | 1.3                                    | 16.5                                     | 0                                      | 0.1                             | 0                                                           | 0.3                     | 3.6                                          | 0                       | 65.9                                                 | 3.2                                                  | 0.1                                                  |
| SVA-13_43 | 0                                | 0.9                                       | 0                                     | 2.8                                    | 10.3                                     | 0                                      | 0.3                             | 0.1                                                         | 0                       | 35.5                                         | 0                       | 45.8                                                 | 4.2                                                  | 0.1                                                  |
| SVA-13_48 | 0                                | 1.4                                       | 0                                     | 2.8                                    | 12.4                                     | 0                                      | 0                               | 0                                                           | 0.1                     | 21.3                                         | 0                       | 59.3                                                 | 2.1                                                  | 0.5                                                  |
| SVA-13_54 | 0                                | 0                                         | 0                                     | 0.6                                    | 1.5                                      | 0.1                                    | 0                               | 0                                                           | 0                       | 2.3                                          | 0                       | 93.3                                                 | 2.1                                                  | 0                                                    |
| SVA-13_65 | 0.1                              | 0.2                                       | 1.2                                   | 0                                      | 14.3                                     | 0                                      | 0                               | 0                                                           | 0.1                     | 0.5                                          | 0                       | 81.8                                                 | 1.8                                                  | 0.1                                                  |
| TAR-13_1  | 0                                | 0                                         | 0                                     | 1.2                                    | 12.2                                     | 0                                      | 1.3                             | 0                                                           | 0                       | 0                                            | 0.1                     | 76.1                                                 | 8.9                                                  | 0                                                    |
| TAR-13_8  | 0                                | 5.7                                       | 0                                     | 4.6                                    | 52.6                                     | 0                                      | 0.1                             | 0                                                           | 0.1                     | 0.1                                          | 0                       | 33.4                                                 | 3.3                                                  | 0                                                    |
| TAR-13_17 | 0                                | 0.2                                       | 0                                     | 0.4                                    | 9                                        | 0                                      | 0                               | 0                                                           | 0                       | 14.1                                         | 0                       | 67.7                                                 | 8.6                                                  | 0                                                    |
| TAR-13_21 | 0                                | 0.1                                       | 0                                     | 12.6                                   | 6.1                                      | 0                                      | 1.3                             | 0                                                           | 0                       | 0                                            | 0                       | 72.1                                                 | 7.6                                                  | 0.1                                                  |
| TAR-13_27 | 0                                | 0                                         | 0                                     | 8.8                                    | 17                                       | 0                                      | 0.1                             | 0                                                           | 0.1                     | 1.7                                          | 0.1                     | 69.0                                                 | 3.2                                                  | 0                                                    |
| TAR-13_28 | 0                                | 0                                         | 0                                     | 1.1                                    | 17.6                                     | 0                                      | 0                               | 0                                                           | 0                       | 0.3                                          | 0                       | 74.5                                                 | 6.5                                                  | 0                                                    |
| TAR-13_30 | 0                                | 0                                         | 0                                     | 2                                      | 1                                        | 0                                      | 0.3                             | 0.6                                                         | 0                       | 1.9                                          | 0.1                     | 87.7                                                 | 6.4                                                  | 0                                                    |
| TAR-13_35 | 0                                | 12.9                                      | 0                                     | 7.2                                    | 26.9                                     | 0                                      | 0.9                             | 0                                                           | 0.4                     | 0                                            | 0.1                     | 32.1                                                 | 0.7                                                  | 18.9                                                 |
| TAR-13_39 | 0                                | 0                                         | 0                                     | 5.2                                    | 6.4                                      | 0                                      | 0.1                             | 0                                                           | 0                       | 0                                            | 0                       | 75.3                                                 | 13                                                   | 0                                                    |
| TAR-13_41 | 0                                | 0                                         | 0                                     | 8.3                                    | 5.4                                      | 0                                      | 2.7                             | 0                                                           | 0                       | 0.1                                          | 0                       | 71.8                                                 | 11.6                                                 | 0                                                    |
| TAR-14_1  | 0                                | 0.3                                       | 0                                     | 0.7                                    | 23.2                                     | 0                                      | 0.1                             | 0                                                           | 16.8                    | 0.7                                          | 0.2                     | 54.8                                                 | 1.9                                                  | 1.4                                                  |
| TAR-14_4  | 0                                | 1                                         | 0                                     | 3.3                                    | 10.1                                     | 0                                      | 0.4                             | 0                                                           | 0.5                     | 1                                            | 12.2                    | 68.9                                                 | 2.4                                                  | 0.1                                                  |
| TAR-14_5  | 0                                | 0.1                                       | 0                                     | 2.7                                    | 4.9                                      | 0                                      | 0.2                             | 0                                                           | 0.2                     | 0.1                                          | 5.1                     | 84.1                                                 | 2.7                                                  | 0                                                    |
| TAR-14_6  | 0                                | 0                                         | 0                                     | 0                                      | 8.1                                      | 0                                      | 0                               | 0                                                           | 4.4                     | 0.5                                          | 0                       | 85.1                                                 | 2                                                    | 0                                                    |
| TAR-14_7  | 0                                | 22.7                                      | 0                                     | 0                                      | 53.1                                     | 0                                      | 0                               | 0                                                           | 1.5                     | 0.4                                          | 10                      | 7.9                                                  | 0.4                                                  | 4                                                    |
| TAR-14_10 | 0.2                              | 0                                         | 0                                     | 9.4                                    | 14.4                                     | 0                                      | 0.1                             | 0                                                           | 0.3                     | 1.2                                          | 0.9                     | 71.1                                                 | 2.4                                                  | 0                                                    |
| TAR-14_11 | 0.2                              | 0                                         | 0                                     | 5.1                                    | 21.1                                     | 0                                      | 0                               | 0                                                           | 0.2                     | 3.6                                          | 8.5                     | 59.8                                                 | 1.5                                                  | 0                                                    |
| TAR-14_12 | 0                                | 0                                         | 0                                     | 3.8                                    | 5.7                                      | 0                                      | 0                               | 0                                                           | 0                       | 20.5                                         | 1.2                     | 67.3                                                 | 1.3                                                  | 0.2                                                  |
| MIT-12_7  | 0                                | 0                                         | 0                                     | 17.8                                   | 12.5                                     | 0                                      | 1                               | 0                                                           | 0                       | 0                                            | 0                       | 63.2                                                 | 5.6                                                  | 0                                                    |
| MIT-12_19 | 0                                | 0.2                                       | 0                                     | 8.2                                    | 23.2                                     | 0                                      | 0.4                             | 0                                                           | 0                       | 2.5                                          | 0.1                     | 61.1                                                 | 4.3                                                  | 0                                                    |
| ICE-12_3  | 0                                | 0.2                                       | 0                                     | 14.9                                   | 27.8                                     | 0                                      | 4.6                             | 0                                                           | 0                       | 16.6                                         | 0                       | 34.5                                                 | 1.4                                                  | 0                                                    |
| ICE-12_4  | 0                                | 1.7                                       | 0                                     | 6.7                                    | 23.3                                     | 0                                      | 1.7                             | 0                                                           | 0                       | 20.0                                         | 0                       | 43.3                                                 | 3.3                                                  | 0                                                    |

**Supplementary Table 5: Eukaryotic community composition**

Distribution of 97% clustered OTUs aligned and assigned to eukaryotes. Values are the relative abundance of the taxa in percentage of total sequences. It is important to note that values are rounded to one digit; therefore the abundance of a taxon with a value of 0 in one sample can range between 0 and 0.04%.

| Taxon     | <i>Amoebozoa</i> | <i>Archaeplastida</i> | <i>Centrohelida</i> | <i>Kathablepharidae</i> | <i>Opisthokonta</i> | <i>RT5iin25</i> | <i>SAR</i> | <i>Zeuk77</i> |
|-----------|------------------|-----------------------|---------------------|-------------------------|---------------------|-----------------|------------|---------------|
| SVA-13_2  | 0                | 68.0                  | 0                   | 0                       | 31.5                | 0               | 0.5        | 0             |
| SVA-13_4  | 0                | 83.3                  | 0                   | 0                       | 4.0                 | 0               | 12.7       | 0.0           |
| SVA-13_10 | 0                | 74.5                  | 0                   | 0                       | 24.7                | 0               | 0.7        | 0             |
| SVA-13_20 | 0                | 81.8                  | 0                   | 0                       | 12.9                | 0               | 5.3        | 0             |
| SVA-13_23 | 0.0              | 63.3                  | 0                   | 0                       | 32.5                | 0               | 2.9        | 0             |
| SVA-13_31 | 0.0              | 82.4                  | 0                   | 0                       | 9.1                 | 0               | 7.9        | 0             |
| SVA-13_33 | 0                | 58.0                  | 0                   | 0                       | 26.8                | 0               | 14.2       | 1.0           |
| SVA-13_36 | 0                | 42.0                  | 0                   | 0                       | 38.4                | 0               | 19.0       | 0.1           |
| SVA-13_43 | 0                | 56.6                  | 0                   | 0                       | 24.4                | 0               | 17.5       | 1.5           |
| SVA-13_48 | 0.1              | 82.5                  | 0                   | 0                       | 12.9                | 0               | 4.2        | 0             |
| SVA-13_54 | 0                | 62.3                  | 0                   | 0                       | 33.8                | 0               | 3.8        | 0             |
| SVA-13_65 | 0                | 67.8                  | 0                   | 0                       | 20.8                | 0               | 9.3        | 0             |
| TAR-13_1  | 0                | 64.1                  | 0                   | 0                       | 32.1                | 0               | 3.8        | 0             |
| TAR-13_8  | 0                | 44.7                  | 0                   | 0                       | 47.9                | 0               | 7.4        | 0             |
| TAR-13_17 | 0                | 27.1                  | 0                   | 0                       | 72.6                | 0               | 0.3        | 0             |
| TAR-13_21 | 0                | 68.0                  | 0                   | 0                       | 23.4                | 0               | 8.5        | 0.1           |
| TAR-13_27 | 0                | 29.5                  | 0                   | 0                       | 68.3                | 0               | 1.8        | 0             |
| TAR-13_28 | 0                | 76.4                  | 0                   | 0                       | 23.2                | 0               | 0.4        | 0             |
| TAR-13_30 | 0                | 38.1                  | 0                   | 0                       | 61.0                | 0               | 1.0        | 0             |
| TAR-13_35 | 0                | 72.8                  | 0                   | 0                       | 19.6                | 0               | 6.7        | 0             |
| TAR-13_39 | 0                | 88.0                  | 0                   | 0                       | 11.0                | 0               | 1.0        | 0             |
| TAR-13_41 | 0                | 75.0                  | 0                   | 0                       | 19.8                | 0               | 5.2        | 0             |
| TAR-14_1  | 0.2              | 38.1                  | 0                   | 0                       | 50.9                | 0               | 10.4       | 0             |
| TAR-14_4  | 0                | 14.2                  | 0                   | 0                       | 69.9                | 0               | 15.3       | 0             |
| TAR-14_5  | 0                | 32.6                  | 0                   | 0                       | 58.5                | 0               | 8.6        | 0             |
| TAR-14_6  | 0.1              | 37.2                  | 0                   | 0                       | 51.1                | 0               | 9.7        | 0             |
| TAR-14_7  | 0                | 47.6                  | 0                   | 0                       | 48.4                | 0               | 1.4        | 0             |
| TAR-14_10 | 0                | 26.0                  | 0                   | 0                       | 71.8                | 0               | 1.4        | 0             |
| TAR-14_11 | 0                | 18.2                  | 0                   | 0                       | 77.2                | 0               | 3.8        | 0             |
| TAR-14_12 | 0                | 68.8                  | 0                   | 0                       | 21.1                | 0               | 9.5        | 0.2           |
| MIT-12_7  | 0                | 47.4                  | 0                   | 0                       | 22.9                | 0               | 29.7       | 0             |
| MIT-12_19 | 0                | 53.0                  | 0                   | 0                       | 25.8                | 0               | 21.2       | 0             |
| ICE-12_3  | 0                | 45.3                  | 0                   | 0                       | 23.2                | 0               | 30.7       | 0.1           |

---

|          |   |      |   |   |      |   |      |     |
|----------|---|------|---|---|------|---|------|-----|
| ICE-12_4 | 0 | 19.8 | 0 | 0 | 29.0 | 0 | 49.6 | 1.6 |
|----------|---|------|---|---|------|---|------|-----|

---

**Supplementary Table 6: “SAR” community composition**

Distribution of 97% clustered OTUs aligned and assigned to the “SAR”-group (*stramenopiles*, *alveolata*, *rhizaria*) and taxa within the *stramenopiles*. Values are the relative abundance of the taxa in percentage of total. The “SAR”-group was screened in order to screen for other other pigmented micro-eukaryotes, *i.e.*, the *Chrysophyceae*. In nearly all samples the relative abundance of *Chrysophyceae* was below 0.1% and therefore they are considered negligible in terms of contribution to albedo.

|           | <i>Alveolata</i> | <i>Rhizaria</i> | <i>Stramenopiles</i> | <i>Stramenopiles</i>                           |                                 |                 |                                   |                                     |                                           |                                           |                                      |                                         |                      |
|-----------|------------------|-----------------|----------------------|------------------------------------------------|---------------------------------|-----------------|-----------------------------------|-------------------------------------|-------------------------------------------|-------------------------------------------|--------------------------------------|-----------------------------------------|----------------------|
|           |                  |                 |                      | <i>CCI40</i>                                   | <i>Chrysophyceae</i>            |                 |                                   |                                     |                                           |                                           | <i>Peronosporomycetes</i>            | <i>Synurales</i>                        | <i>Xanthophyceae</i> |
|           |                  |                 |                      | <i>CCMP1899,<br/>Chrysophyceae<br/>sp. I76</i> | <i>CCMP1899,<br/>Ochromonas</i> | <i>CCMP1899</i> | <i>Chromulinales,<br/>LG31-02</i> | <i>Chrysocapsales,<br/>Hydrurus</i> | <i>Ochromonadales,<br/>Paraphysomonas</i> | <i>Phytophthora,<br/>Halophytophthora</i> | <i>Synura,<br/>Synura<br/>uvella</i> | <i>Tribonematales,<br/>Botrydiopsis</i> |                      |
| SVA-13_2  | 0.2              | 0.3             | 0                    | 0                                              | 0                               | 0               | 0                                 | 0                                   | 0                                         | 0                                         | 0                                    | 0                                       |                      |
| SVA-13_4  | 1.6              | 11.0            | 0.0                  | 0                                              | 0                               | 0               | 0                                 | 0                                   | 0                                         | 0.03                                      | 0                                    | 0                                       |                      |
| SVA-13_10 | 0.2              | 0.5             | 0.1                  | 0                                              | 0                               | 0.02            | 0.03                              | 0                                   | 0                                         | 0                                         | 0                                    | 0                                       |                      |
| SVA-13_20 | 0.3              | 5.1             | 0                    | 0                                              | 0                               | 0               | 0                                 | 0                                   | 0                                         | 0                                         | 0                                    | 0                                       |                      |
| SVA-13_23 | 0.0              | 2.9             | 0                    | 0                                              | 0                               | 0               | 0                                 | 0                                   | 0                                         | 0                                         | 0                                    | 0                                       |                      |
| SVA-13_31 | 0.1              | 5.2             | 2.6                  | 0                                              | 0.01                            | 0.05            | 2.46                              | 0.06                                | 0                                         | 0                                         | 0                                    | 0                                       |                      |
| SVA-13_33 | 6.6              | 7.4             | 0.1                  | 0.03                                           | 0                               | 0               | 0.03                              | 0                                   | 0                                         | 0                                         | 0                                    | 0                                       |                      |
| SVA-13_36 | 4.6              | 14.3            | 0.1                  | 0                                              | 0                               | 0               | 0.01                              | 0                                   | 0                                         | 0.02                                      | 0                                    | 0.01                                    |                      |
| SVA-13_43 | 7.2              | 10.3            | 0                    | 0                                              | 0                               | 0               | 0                                 | 0                                   | 0                                         | 0                                         | 0                                    | 0                                       |                      |
| SVA-13_48 | 0.0              | 3.4             | 0.7                  | 0                                              | 0.02                            | 0               | 0.7                               | 0.02                                | 0                                         | 0                                         | 0                                    | 0                                       |                      |
| SVA-13_54 | 0.8              | 2.4             | 0.1                  | 0                                              | 0                               | 0               | 0.08                              | 0                                   | 0                                         | 0                                         | 0                                    | 0.05                                    |                      |
| SVA-13_65 | 0.5              | 5.0             | 3.8                  | 0                                              | 0.02                            | 0.06            | 3.74                              | 0                                   | 0                                         | 0                                         | 0                                    | 0                                       |                      |
| TAR-13_1  | 0.1              | 3.7             | 0                    | 0                                              | 0                               | 0               | 0                                 | 0                                   | 0                                         | 0                                         | 0                                    | 0                                       |                      |
| TAR-13_8  | 1.4              | 6.0             | 0                    | 0                                              | 0                               | 0               | 0                                 | 0                                   | 0                                         | 0                                         | 0                                    | 0                                       |                      |
| TAR-13_17 | 0.1              | 0.3             | 0                    | 0                                              | 0                               | 0               | 0                                 | 0                                   | 0                                         | 0                                         | 0                                    | 0                                       |                      |
| TAR-13_21 | 0.4              | 7.9             | 0.2                  | 0                                              | 0                               | 0               | 0                                 | 0                                   | 0                                         | 0.23                                      | 0                                    | 0                                       |                      |
| TAR-13_27 | 0.0              | 1.8             | 0.0                  | 0                                              | 0                               | 0               | 0                                 | 0                                   | 0.02                                      | 0                                         | 0                                    | 0                                       |                      |
| TAR-13_28 | 0.0              | 0.4             | 0                    | 0                                              | 0                               | 0               | 0                                 | 0                                   | 0                                         | 0                                         | 0                                    | 0                                       |                      |
| TAR-13_30 | 0.0              | 1.0             | 0                    | 0                                              | 0                               | 0               | 0                                 | 0                                   | 0                                         | 0                                         | 0                                    | 0                                       |                      |
| TAR-13_35 | 4.8              | 1.9             | 0.0                  | 0                                              | 0                               | 0               | 0                                 | 0                                   | 0.02                                      | 0                                         | 0                                    | 0                                       |                      |
| TAR-13_39 | 0.1              | 1.0             | 0                    | 0                                              | 0                               | 0               | 0                                 | 0                                   | 0                                         | 0                                         | 0                                    | 0                                       |                      |
| TAR-13_41 | 0.1              | 5.2             | 0                    | 0                                              | 0                               | 0               | 0                                 | 0                                   | 0                                         | 0                                         | 0                                    | 0                                       |                      |
| TAR-14_1  | 0.0              | 10.3            | 0.1                  | 0                                              | 0                               | 0               | 0                                 | 0                                   | 0.02                                      | 0                                         | 0                                    | 0                                       |                      |
| TAR-14_4  | 0.0              | 15.2            | 0.0                  | 0                                              | 0                               | 0               | 0                                 | 0                                   | 0.01                                      | 0                                         | 0                                    | 0                                       |                      |



|           |     |       |     |      |   |   |   |   |      |      |   |   |      |      |
|-----------|-----|-------|-----|------|---|---|---|---|------|------|---|---|------|------|
| TAR-14_5  | 0.1 | 8.5   | 0.1 | 0    | 0 | 0 | 0 | 0 | 0    | 0.06 | 0 | 0 | 0    | 0    |
| TAR-14_6  | 0.1 | 9.7   | 0   | 0    | 0 | 0 | 0 | 0 | 0    | 0    | 0 | 0 | 0    | 0    |
| TAR-14_7  | 0   | 1.43  | 0   | 0    | 0 | 0 | 0 | 0 | 0    | 0    | 0 | 0 | 0    | 0    |
| TAR-14_10 | 0.1 | 1.2   | 0.1 | 0    | 0 | 0 | 0 | 0 | 0    | 0.13 | 0 | 0 | 0    | 0    |
| TAR-14_11 | 0.5 | 3.2   | 0.2 | 0    | 0 | 0 | 0 | 0 | 0    | 0.12 | 0 | 0 | 0.03 | 0    |
| TAR-14_12 | 0.8 | 1.7   | 7.0 | 0.07 | 0 | 0 | 0 | 0 | 0    | 6.79 | 0 | 0 | 0.11 | 0    |
| MIT-12_7  | 1.7 | 28.0  | 0   | 0    | 0 | 0 | 0 | 0 | 0    | 0    | 0 | 0 | 0    | 0    |
| MIT-12_19 | 0.8 | 20.4  | 0   | 0    | 0 | 0 | 0 | 0 | 0    | 0    | 0 | 0 | 0    | 0    |
| ICE-12_3  | 0.5 | 30.11 | 0.1 | 0    | 0 | 0 | 0 | 0 | 0    | 0.11 | 0 | 0 | 0    | 0    |
| ICE-12_4  | 6.4 | 42.46 | 0.8 | 0    | 0 | 0 | 0 | 0 | 0.40 | 0.20 | 0 | 0 | 0    | 0.20 |

**Supplementary Table 7: Archaeal community composition**

Distribution of 97% clustered OTUs aligned and assigned to archaea. It is important to note that values are rounded to one digit; therefore the abundance of a taxon with a value of 0 in one sample can range between 0 and 0.04%. The archaeal community composition revealed no biogeographical patterns and was also characterised by low species diversity. In most samples the main representatives were *Crenarchaeota* with the order *Nitrososphaerales* dominating (up to 100%).

| Phylum    | <i>Crenarchaeota</i> |                              |                               |                                                |                                                    | <i>Euryarchaeota</i>                                 |                                                      |                                                     |                                     |  |
|-----------|----------------------|------------------------------|-------------------------------|------------------------------------------------|----------------------------------------------------|------------------------------------------------------|------------------------------------------------------|-----------------------------------------------------|-------------------------------------|--|
|           | <i>MBGA</i>          | <i>MBGA;</i><br><i>NRP-J</i> | <i>MCG;</i><br><i>pGrfC26</i> | <i>Thaumarchaeota;</i><br><i>Cenarchaeales</i> | <i>Thaumarchaeota;</i><br><i>Nitrososphaerales</i> | <i>Methanobacteria;</i><br><i>Methanobacteriales</i> | <i>Methanomicrobia;</i><br><i>Methanomicrobiales</i> | <i>Methanomicrobia;</i><br><i>Methanosarcinales</i> | <i>Thermoplasmata;</i><br><i>E2</i> |  |
| SVA-13_2  | 0                    | 0                            | 0                             | 0.3                                            | 99.7                                               | 0.0                                                  |                                                      | 0                                                   | 0                                   |  |
| SVA-13_23 | 0                    | 0                            | 0                             | 0.5                                            | 99.4                                               | 0.2                                                  |                                                      | 0                                                   | 0                                   |  |
| SVA-13_31 | 0                    | 0                            | 0                             | 0.0                                            | 99.4                                               | 0.6                                                  |                                                      | 0                                                   | 0                                   |  |
| SVA-13_36 | 0                    | 0                            | 0                             | 3.6                                            | 92.9                                               | 2.4                                                  |                                                      | 0                                                   | 1.2                                 |  |
| SVA-13_48 | 0                    | 0                            | 0                             | 5.0                                            | 16.8                                               | 78.2                                                 |                                                      | 0                                                   | 0                                   |  |
| SVA-13_54 | 0                    | 0                            | 0                             | 13.2                                           | 74.5                                               | 8.5                                                  |                                                      | 0                                                   | 3.8                                 |  |
| SVA-13_65 | 0                    | 0                            | 0                             | 14.3                                           | 42.9                                               | 28.6                                                 | 14.3                                                 | 0                                                   | 0                                   |  |
| TAR-13_8  | 0                    | 0                            | 0                             | 4.9                                            | 86.2                                               | 2.0                                                  | 1.2                                                  | 0                                                   | 5.7                                 |  |
| TAR-14_1  | 0                    | 0                            | 0                             | 0.1                                            | 100.0                                              | 0                                                    |                                                      | 0                                                   | 0                                   |  |
| TAR-14_4  | 0                    | 0                            | 0                             | 0.6                                            | 99.4                                               | 0                                                    |                                                      | 0                                                   | 0.0                                 |  |
| TAR-14_5  | 0                    | 0                            | 0                             | 2.2                                            | 97.8                                               | 0                                                    |                                                      | 0                                                   | 0                                   |  |
| TAR-14_6  | 0                    | 0                            | 0                             | 0                                              | 0                                                  | 0                                                    |                                                      | 90.0                                                | 10.0                                |  |
| ICE-12_3  | 0                    | 0                            | 0                             | 2.8                                            | 96.5                                               | 0                                                    |                                                      | 0                                                   | 0                                   |  |
| ICE-12_4  | 0                    | 0                            | 0                             | 0.7                                            | 27.6                                               | 0                                                    |                                                      | 71.6                                                | 0                                   |  |

### Supplementary Table 8: Quality control of DNA sequences

Number of sequences before and after quality control, assigned to taxa and with respective Shannon diversity indices for eukaryotes, algae and bacteria, which did not show significant differences between locations (Supplementary Table 14). Shannon indices for archaea have not been calculated due to the very low species diversity.

|           | Eukaryotes |               |         | Algae                  |         | Bacteria |               |                           |         | Archaea  |               |                          |
|-----------|------------|---------------|---------|------------------------|---------|----------|---------------|---------------------------|---------|----------|---------------|--------------------------|
|           | Raw seqs   | Seqs after QC | Shannon | Seqs assigned to algae | Shannon | Raw seqs | Seqs after QC | Seqs assigned to bacteria | Shannon | Raw seqs | Seqs after QC | Seqs assigned to archaea |
| SVA-13_2  | 6135       | 5148          | 3.34    | 3500                   | 2.34    | 98*      | 4*            | 1*                        |         | 60965    | 54688         | 53817                    |
| SVA-13_4  | 6979       | 3937          | 4.56    | 3280                   | 3.41    | 7509     | 1421          | 770                       | 6.16    |          |               |                          |
| SVA-13_10 | 13448      | 6583          | 4.24    | 4904                   | 3.52    | 29728    | 3511          | 334                       | 6.69    |          |               |                          |
| SVA-13_20 | 7130       | 3952          | 5.20    | 3226                   | 4.08    | 12881    | 2344          | 987                       | 7.00    |          |               |                          |
| SVA-13_23 | 5373       | 4485          | 2.93    | 2832                   | 1.74    | 8352     | 4008          | 1850                      | 5.36    | 1695     | 732           | 657                      |
| SVA-13_31 | 12752      | 10621         | 3.07    | 8743                   | 1.79    | 5040     | 2341          | 598                       | 5.52    |          | 43331         | 42417                    |
| SVA-13_33 | 7678       | 3008          | 6.22    | 1727                   | 4.40    | 9129     | 1911          | 1041                      | 6.86    |          |               |                          |
| SVA-13_36 | 23283      | 16789         | 5.28    | 7056                   | 2.93    | 11503    | 6109          | 2573                      | 4.26    | 2318     | 921           | 272                      |
| SVA-13_43 | 16457      | 5447          | 7.24    | 3059                   | 5.43    | 5473     | 988           | 627                       | 6.60    |          |               |                          |
| SVA-13_48 | 6294       | 5123          | 3.96    | 4184                   | 2.93    | 2838     | 1183          | 556                       | 4.83    | 2665     | 722           | 410                      |
| SVA-13_54 | 23068      | 16698         | 3.89    | 10391                  | 1.68    | 3777     | 1519          | 812                       | 4.84    | 39830    | 34942         | 34121                    |
| SVA-13_65 | 7362       | 5408          | 4.17    | 3667                   | 2.42    | 13545    | 7349          | 4245                      | 4.25    | 1267     | 295           | 68                       |
| TAR-13_1  | 9632       | 4770          | 5.29    | 3058                   | 4.23    | 21581    | 6431          | 5087                      | 4.39    |          |               |                          |
| TAR-13_8  | 77757      | 26947         | 5.85    | 12012                  | 4.64    | 12368    | 3661          | 1051                      | 4.39    | 2059     | 926           | 310                      |
| TAR-13_17 | 8767       | 4863          | 4.85    | 1318                   | 4.68    | 16240    | 5850          | 3632                      | 4.36    |          |               |                          |
| TAR-13_21 | 9330       | 4354          | 5.25    | 2920                   | 3.89    | 10946    | 3997          | 3169                      | 5.45    |          |               |                          |
| TAR-13_27 | 19416      | 15725         | 2.55    | 4639                   | 3.04    | 16105    | 2297          | 630                       | 5.87    |          |               |                          |
| TAR-13_28 | 9402       | 5344          | 4.39    | 4082                   | 3.56    | 15312    | 2525          | 227                       | 6.28    |          |               |                          |
| TAR-13_30 | 6493       | 3042          | 4.56    | 1133                   | 2.91    | 10571    | 2327          | 1558                      | 5.27    |          |               |                          |
| TAR-13_35 | 7274       | 5474          | 4.91    | 3987                   | 3.61    | 4562     | 2424          | 1437                      | 4.04    |          |               |                          |
| TAR-13_39 | 11667      | 6810          | 4.25    | 5992                   | 3.41    | 15247    | 3447          | 0*                        |         |          |               |                          |
| TAR-13_41 | 7606       | 3715          | 4.83    | 2785                   | 3.73    | 17534    | 5305          | 3651                      | 4.99    |          |               |                          |
| TAR-14_1  | 12436      | 9069          | 5.12    | 3454                   | 3.34    | 3009     | 1705          | 1356                      | 4.00    | 148712   | 146362        | 145547                   |
| TAR-14_4  | 10393      | 7341          | 5.40    | 1013                   | 2.93    | 8647     | 5419          | 3922                      | 5.55    | 1023027  | 886676        | 879402                   |
| TAR-14_5  | 4251       | 3254          | 3.99    | 1059                   | 1.86    | 1974     | 1064          | 724                       | 5.86    | 1020     | 590           | 520                      |
| TAR-14_6  | 7573       | 5312          | 3.93    | 1976                   | 2.03    | 9112     | 4794          | 3868                      | 2.25    | 587      | 414           | 109                      |
| TAR-14_7  | 2038       | 1265          | 5.71    | 586                    | 3.76    | 6318     | 3729          | 2055                      | 6.04    |          |               |                          |
| TAR-14_10 | 6037       | 4720          | 3.68    | 1218                   | 2.50    | 5809     | 3158          | 2412                      | 5.32    |          |               |                          |
| TAR-14_11 | 4899       | 3453          | 5.47    | 614                    | 3.42    | 4453     | 2404          | 1893                      | 4.76    |          |               |                          |
| TAR-14_12 | 7387       | 5701          | 4.29    | 3909                   | 2.54    | 1892     | 979           | 425                       | 4.30    |          |               |                          |
| MIT-12_7  | 5375       | 869           | 6.15    | 412                    | 4.11    | 21459    | 1712          | 988                       | 6.45    |          |               |                          |
| MIT-12_19 | 6007       | 2342          | 6.12    | 1240                   | 4.44    | 6503     | 1979          | 963                       | 5.92    |          |               |                          |
| ICE-12_3  | 5474       | 2013          | 5.55    | 1509                   | 4.50    | 6383     | 2333          | 1602                      | 5.13    | 9206     | 1443          | 4*                       |
| ICE-12_4  | 1908       | 597           | 6.02    | 359                    | 4.47    | 2533     | 818           | 444                       | 5.27    | 18323    | 6294          | 540                      |

\* removed from analysis due to low sequence numbers

**Supplementary Table 9: Algal cell counts, size and biomass**

Snow algal cell counts for the Svalbard (SVA), Sweden (TAR) and Greenland (MIT) samples, average diameter of the cells in each sample and inferred cell volume (assuming a spherical cell shape) and biomass (cell counts x volume). No cell counts for the Iceland samples. Large variations in cell counts of individual samples may be derived from possible interferences with inorganic impurities that make cell enumerations in snow samples challenging<sup>3</sup>.

| Sample ID | Cell counts<br>[mL <sup>-1</sup> ] | Diameter<br>[μm] | Volume<br>[μm <sup>3</sup> ] | Biomass<br>[mm <sup>3</sup> L <sup>-1</sup> ] |
|-----------|------------------------------------|------------------|------------------------------|-----------------------------------------------|
| SVA-13_2  | 28125 ± 4419                       | 6.4 ± 2.0        | 137                          | 4                                             |
| SVA-13_4  | 15104 ± 2210                       | 12.0 ± 3.4       | 904                          | 14                                            |
| SVA-13_10 | 8750 ± 11110                       | 15.8 ± 4.4       | 2064                         | 18                                            |
| SVA-13_20 | 32292 ± 24307                      | n.d.             | n.d.                         | n.d.                                          |
| SVA-13_23 | 61875 ± 6187                       | n.d.             | n.d.                         | n.d.                                          |
| SVA-13_31 | 75000 ± 35355                      | n.d.             | n.d.                         | n.d.                                          |
| SVA-13_33 | 6875 ± 2652                        | 12.0 ± 2.5       | 904                          | 6                                             |
| SVA-13_36 | n.d.                               | 12.1 ± 3.4       | n.d.                         | n.d.                                          |
| SVA-13_43 | 9191 ± 4864                        | 20.0 ± 7.6       | 4187                         | 38                                            |
| SVA-13_48 | 23438 ± 6629                       | n.d.             | n.d.                         | n.d.                                          |
| SVA-13_54 | 43750 ± 6629                       | 13.0 ± 4.7       | 1150                         | 50                                            |
| SVA-13_65 | 27344 ± 16573                      | 18.0 ± 6.3       | 3052                         | 83                                            |
| TAR-13_1  | 31250 ± 22097                      | 14.3 ± 4.1       | 1530                         | 36                                            |
| TAR-13_5  | 23438 ± 11049                      | n.d.             | n.d.                         | n.d.                                          |
| TAR-13_8  | 3438 ± 1326                        | 15.0 ± 5.0       | 1766                         | 3                                             |
| TAR-13_17 | 26787                              | n.d.             | n.d.                         | n.d.                                          |
| TAR-13_21 | 6757 ± 2389                        | 18.2 ± 3.9       | 3155                         | 15                                            |
| TAR-13_27 | 16667 ± 10312                      | 19.0 ± 3.9       | 3590                         | 36                                            |
| TAR-13_28 | n.d.                               | 16.0 ± 2.7       | n.d.                         | n.d.                                          |
| TAR-13_32 | 29785 ± 7596                       | 13.9 ± 3.1       | 1405                         | 35                                            |
| TAR-13_36 | 6875.                              | 17.1 ± 3.1       | 2617                         | 18                                            |
| TAR-13_39 | 15625 ± 4419                       | 18.6 ± 5.1       | 3368                         | 2                                             |
| TAR-13_41 | 41146 ± 6629                       | 21.5 ± 4.4       | 5201                         | 14                                            |
| TAR-13_42 | 31250 ± 5682                       | 12.5 ± 3.0       | 1022                         | 36                                            |
| MIT-12_7  | 25800                              | n.d.             | n.d.                         | n.d.                                          |
| MIT-12_19 | 5900                               | n.d.             | n.d.                         | n.d.                                          |

n.d. = not determined

### Supplementary Table 10: Fatty acid composition

Fatty acid composition of the Svalbard (SVA) and Northern Sweden (TAR) samples as they contained sufficient particulate material for analysis. Fatty acid compounds are reported as percentage of total fatty acids. Most prominent fatty acids are reported as well as total saturated (SFA), total monounsaturated (MUFA) and total polyunsaturated (PUFA) fatty acids. b=branched, A = Alkane.

Although the sample preparation method, i.e. the filtration step, could potentially allow the extraction of fatty acids from non-algal sources, e.g. bacteria, the suite of fatty acids recovered from both Svalbard and Northern Sweden is characteristic of snow algae, with high abundance of monounsaturated and polyunsaturated C18 fatty acids and C16:0 and C16:4 fatty acids<sup>4</sup>. Site TAR-13-1 has the only occurrence of a branched C15 fatty acid, which has not been reported from snow algae but is typical of bacteria, including Sphingobacteria<sup>5</sup>. This is consistent with the dominance of Sphingobacteria OTUs (91.1 % of total bacterial sequences) at this site (**Supplementary Table 2**). The absence of putative bacterial fatty acids at other sites likely reflects lower abundance relative to algal taxa.

| Sample ID | C14:0 | C15:0 | C15 b | C16:0 | C16:1 | C16:3 | C16:4 | C18:0 | C18:1 | C18:2 | C18:3 | C18:4 | C20:0 | C21<br>A | C22:0 | C23<br>A | C24:0 | C27<br>A | SFA | MUFA | PUFA |
|-----------|-------|-------|-------|-------|-------|-------|-------|-------|-------|-------|-------|-------|-------|----------|-------|----------|-------|----------|-----|------|------|
| SVA-13_2  | 0     | 0     | 0     | 25    | 0     | 2     | 12    | 5     | 16    | 9     | 15    | 10    | 3     | 0        | 2     | 0        | 0     | 0        | 34  | 16   | 49   |
| SVA-13_4  | 2     | 0     | 0     | 25    | 1     | 2     | 13    | 3     | 15    | 5     | 20    | 9     | 3     | 0        | 1     | 0        | 0     | 0        | 35  | 16   | 50   |
| SVA-13_10 | 0     | 0     | 0     | 28    | 0     | 0     | 12    | 8     | 2     | 7     | 31    | 9     | 1     | 0        | 0     | 0        | 0     | 0        | 37  | 2    | 59   |
| SVA-13_20 | 0     | 0     | 0     | 23    | 2     | 2     | 15    | 4     | 13    | 7     | 27    | 7     | 0     | 0        | 0     | 0        | 0     | 0        | 27  | 14   | 59   |
| SVA-13_23 | 3     | 0     | 0     | 23    | 2     | 2     | 15    | 3     | 12    | 6     | 27    | 7     | 0     | 0        | 0     | 0        | 0     | 0        | 29  | 14   | 57   |
| SVA-13_31 | 0     | 0     | 0     | 24    | 4     | 2     | 12    | 4     | 15    | 9     | 22    | 9     | 0     | 0        | 0     | 0        | 0     | 0        | 27  | 19   | 53   |
| SVA-13_33 | 0     | 0     | 0     | 23    | 7     | 1     | 6     | 6     | 15    | 10    | 18    | 5     | 2     | 0        | 1     | 1        | 0     | 0        | 32  | 23   | 40   |
| SVA-13_36 | 1     | 0     | 0     | 30    | 2     | 1     | 7     | 5     | 15    | 8     | 14    | 6     | 2     | 1        | 2     | 0        | 0     | 2        | 40  | 17   | 37   |
| SVA-13_43 | 1     | 0     | 0     | 20    | 3     | 2     | 8     | 4     | 17    | 8     | 14    | 3     | 4     | 1        | 2     | 0        | 1     | 0        | 32  | 20   | 36   |
| SVA-13_48 | 0     | 0     | 0     | 20    | 3     | 2     | 12    | 3     | 13    | 10    | 21    | 9     | 0     | 0        | 0     | 0        | 0     | 0        | 24  | 16   | 54   |
| SVA-13_54 | 2     | 0     | 0     | 27    | 1     | 4     | 14    | 2     | 14    | 8     | 18    | 8     | 1     | 0        | 0     | 0        | 0     | 0        | 32  | 15   | 52   |
| TAR-13_1  | 2     | 0     | 1     | 45    | 4     | 5     | 35    | 0     | 0     | 0     | 0     | 0     | 2     | 0        | 1     | 0        | 0     | 0        | 50  | 4    | 40   |
| TAR-13_5  | 3     | 0     | 0     | 26    | 0     | 0     | 19    | 3     | 15    | 1     | 31    | 0     | 0     | 0        | 0     | 0        | 0     | 0        | 32  | 15   | 52   |
| TAR-13_8  | 3     | 0     | 0     | 0     | 3     | 4     | 0     | 6     | 19    | 3     | 37    | 7     | 4     | 0        | 3     | 2        | 2     | 4        | 18  | 22   | 51   |
| TAR-13_21 | 0     | 1     | 0     | 31    | 2     | 2     | 8     | 2     | 13    | 4     | 20    | 13    | 0     | 0        | 1     | 0        | 1     | 0        | 37  | 15   | 48   |
| TAR-13_27 | 0     | 0     | 0     | 42    | 0     | 1     | 7     | 5     | 12    | 4     | 11    | 3     | 4     | 0        | 3     | 1        | 2     | 2        | 56  | 12   | 26   |
| TAR-13_28 | 0     | 0     | 0     | 25    | 1     | 2     | 13    | 5     | 12    | 10    | 16    | 15    | 1     | 0        | 0     | 0        | 0     | 0        | 32  | 13   | 56   |
| TAR-13_30 | 0     | 0     | 0     | 39    | 0     | 0     | 4     | 14    | 8     | 6     | 6     | 4     | 5     | 1        | 3     | 1        | 2     | 2        | 62  | 8    | 19   |
| TAR-13_32 | 0     | 0     | 0     | 22    | 2     | 2     | 16    | 4     | 13    | 7     | 21    | 12    | 0     | 0        | 0     | 0        | 0     | 0        | 26  | 15   | 58   |
| TAR-13_35 | 0     | 0     | 0     | 34    | 0     | 2     | 9     | 17    | 10    | 5     | 14    | 3     | 2     | 0        | 2     | 0        | 0     | 0        | 55  | 10   | 31   |
| TAR-13_37 | 0     | 0     | 0     | 21    | 0     | 2     | 15    | 6     | 12    | 0     | 28    | 14    | 0     | 0        | 0     | 0        | 0     | 0        | 26  | 12   | 60   |
| TAR-13_39 | 0     | 0     | 0     | 26    | 1     | 2     | 13    | 3     | 12    | 7     | 20    | 10    | 1     | 0        | 1     | 0        | 0     | 1        | 31  | 13   | 53   |
| TAR-13_41 | 0     | 0     | 0     | 24    | 2     | 2     | 9     | 7     | 13    | 9     | 18    | 8     | 2     | 0        | 2     | 0        | 0     | 2        | 34  | 16   | 46   |
| TAR-13_42 | 0     | 0     | 0     | 21    | 1     | 3     | 17    | 4     | 13    | 5     | 22    | 12    | 1     | 0        | 0     | 0        | 0     | 0        | 26  | 15   | 58   |

### Supplementary Table 11: Pigment composition

Pigment composition of samples from Svalbard (SVA) and Northern Sweden (TAR) as they contained sufficient particulate material for analysis. Individual pigments were quantified in ug/L and are reported as total chlorophylls, total primary carotenoids and total secondary carotenoids in % of total pigments. Chl a = chlorophyll a, Chl b = chlorophyll b, Neo = Neoxanthin, Vio = Violaxanthin, Ant = Antheraxanthin, Lut = Lutein, Zea = Zeaxanthin,  $\beta$ -car =  $\beta$ -carotene, Ast=Astaxanthin, n.d.= not detected. Although the sample preparation method, i.e. the filtration step, could potentially allow the extraction of pigments from non-algal sources, e.g. bacteria, the suite of pigments recovered from both Svalbard and Northern Sweden is characteristic of snow alga and will be dominated by algal contribution in all cases,

| Sample ID | Chl a | Chl b | Neo  | Vio  | Ant  | Lut  | Zea  | b-car | trans-Ast | cis-Ast | trans- Ast mono esters | cis-Ast mono esters | total Ast di esters | total chloro-phylls [%] | total primary carotenoids [%] | total secondary carotenoids [%] |
|-----------|-------|-------|------|------|------|------|------|-------|-----------|---------|------------------------|---------------------|---------------------|-------------------------|-------------------------------|---------------------------------|
| SVA-13-2  | 3682  | 3132  | 215  | 147  | n.d. | 1155 | n.d. | 15    | 2976      | 115     | 62922                  | 6457                | 1523                | 8                       | 3                             | 89                              |
| SVA-13-4  | 3359  | 2873  | 114  | 175  | n.d. | 1133 | n.d. | 81    | 2664      | 116     | 38758                  | 4397                | 1776                | 11                      | 4                             | 85                              |
| SVA-13_10 | 882   | 748   | 25   | 10   | n.d. | 351  | n.d. | 853   | 1002      | 15      | 5164                   | 362                 | 76                  | 17                      | 14                            | 69                              |
| SVA-13_20 | 1200  | 980   | 100  | 36   | 6    | 573  | n.d. | 3193  | 3090      | 194     | 17661                  | 1906                | 2316                | 7                       | 13                            | 80                              |
| SVA-13_23 | 1703  | 1141  | 239  | 290  | 107  | 1080 | n.d. | 1059  | 4648      | 372     | 17305                  | 1916                | 2779                | 9                       | 9                             | 82                              |
| SVA-13_31 | 327   | 266   | 308  | 468  | n.d. | 1116 | n.d. | 51    | 3927      | 164     | 1448                   | 21                  | 178                 | 7                       | 23                            | 69                              |
| SVA-13_33 | 534   | 426   | 33   | 26   | n.d. | 355  | n.d. | 237   | 1251      | 64      | 3248                   | 201                 | 540                 | 14                      | 10                            | 77                              |
| SVA-13_36 | 376   | 230   | 93   | 98   | n.d. | 155  | n.d. | 501   | 1456      | 86      | 9142                   | 877                 | 1318                | 4                       | 6                             | 90                              |
| SVA-13_43 | 672   | 757   | 56   | 113  | n.d. | 577  | n.d. | 298   | 868       | 9       | 4332                   | 432                 | 1873                | 14                      | 11                            | 75                              |
| SVA-13_54 | 450   | 507   | 472  | 624  | n.d. | 1525 |      | 240   | 9272      | 904     | 5640                   | 546                 | 745                 | 5                       | 14                            | 82                              |
| TAR-13_1  | 3253  | 2712  | 117  | 328  | 0    | 1499 | 9    | 1025  | 1867      | 101     | 28521                  | 3562                | 4005                | 8                       | 4                             | 88                              |
| TAR-13_5  | 6068  | 5167  | 354  | 670  | 351  | 2449 | 88   | 957   | 3546      | 266     | 48066                  | 6860                | 6299                | 8                       | 4                             | 88                              |
| TAR-13_8  | 3084  | 3212  | 315  | 1149 | 73   | 2574 | 14   | 728   | 3658      | 225     | 21286                  | 2508                | 6384                | 9                       | 7                             | 84                              |
| TAR-13_17 | 2153  | 1605  | 402  | 721  | n.d. | 1637 | n.d. | 1136  | 3292      | 122     | 16014                  | 3063                | 3949                | 7                       | 8                             | 85                              |
| TAR-13_21 | 1323  | 1266  | 315  | 374  | n.d. | 1384 | n.d. | 390   | 2386      | 158     | 13318                  | 1449                | 2447                | 7                       | 6                             | 87                              |
| TAR-13_27 | 478   | 373   | n.d. | n.d. | n.d. | 241  | n.d. | 50    | 398       | n.d.    | 3145                   | 286                 | 404                 | 10                      | 3                             | 87                              |
| TAR-13_28 | 672   | 417   | 597  | 381  | n.d. | 563  | n.d. | 88    | 1886      | 115     | 11182                  | 1113                | 959                 | 4                       | 5                             | 91                              |
| TAR-13_30 | 495   | 328   | 0    | -31  | n.d. | 89   | n.d. | n.d.  | 243       | n.d.    | 3035                   | 164                 | 202                 | 11                      | 1                             | 89                              |
| TAR-13_32 | 2490  | 2203  | 304  | 823  | 69   | 2021 | 7    | 459   | 2078      | 59      | 20966                  | 2608                | 2913                | 8                       | 6                             | 86                              |
| TAR-13_35 | 2319  | 1578  | 50   | 162  | n.d. | 691  | n.d. | 402   | 963       | 14      | 10994                  | 1557                | 2416                | 11                      | 5                             | 84                              |
| TAR-13_36 | 492   | 310   | 157  | 154  | n.d. | 628  | n.d. | 107   | 1599      | 92      | 6407                   | 551                 | 981                 | 4                       | 6                             | 90                              |
| TAR-13_37 | 1655  | 1328  | 47   | 59   | n.d. | 638  | n.d. | 102   | 1351      | 57      | 5628                   | 749                 | 1229                | 15                      | 5                             | 79                              |
| TAR-13_41 | 541   | 426   | 747  | 565  | 48   | 1180 | n.d. | 640   | 2764      | 222     | 8401                   | 884                 | 1766                | 4                       | 12                            | 85                              |
| TAR-13_42 | 7724  | 8730  | 1007 | 1391 | 111  | 5052 | 8    | 778   | 5032      | 205     | 29339                  | 3554                | 4411                | 16                      | 9                             | 75                              |
| TAR-14_1  | 1414  | 632   | n.d. | n.d. | n.d. | 318  | n.d. | n.d.  | 938       | n.d.    | 21910                  | 2344                | 639                 | 6                       | 24                            | 71                              |
| TAR-14_4  | 369   | n.d.  | n.d. | n.d. | n.d. | n.d. | n.d. | n.d.  | 76        | n.d.    | 693                    | n.d.                | n.d.                | 32                      | n.d.                          | 68                              |
| TAR-14_5  | 2864  | 1391  | n.d. | n.d. | n.d. | 528  | 22   | n.d.  | 207       | n.d.    | 2418                   | 304                 | 47                  | 55                      | 7                             | 38                              |
| TAR-14_6  | 14924 | 10007 | 822  | 752  | 312  | 4414 | n.d. | n.d.  | 17256     | 662     | 141903                 | 13779               | 3548                | 12                      | 4                             | 84                              |
| TAR-14_7  | 4458  | 2533  | 59   | n.d. | 29   | 963  | 6    | n.d.  | 330       | n.d.    | 4565                   | 391                 | n.d.                | 52                      | 9                             | 39                              |
| TAR-14_10 | 594   | n.d.  | n.d. | n.d. | n.d. | 49   | n.d. | n.d.  | 238       | n.d.    | 6358                   | 663                 | 133                 | 7                       | 2                             | 90                              |
| TAR-14_11 | 332   | n.d.  | n.d. | n.d. | n.d. | n.d. | n.d. | n.d.  | 102       | n.d.    | 102                    | n.d.                | n.d.                | 76                      | n.d.                          | 24                              |
| TAR-14_12 | 4238  | 2694  | 16   | 25   | n.d. | 1013 | 4    | n.d.  | 1751      | 170     | 45152                  | 5915                | 1015                | 11                      | 2                             | 86                              |

### Supplementary Table 12: Aqueous geochemical composition

Aqueous geochemical data for dissolved organic carbon (DOC), nutrients ( $\text{PO}_4^{3-}$ ,  $\text{NO}_3^-$ ,  $\text{SO}_4^{2-}$ ) and trace metals (Al to Zn) in the filtered red snow samples from Svalbard (SVA), Northern Sweden (TAR), Greenland (MIT) and Iceland (ICE).

| Sample ID | DOC  | $\text{PO}_4^{3-}$ | $\text{NO}_3^-$ | $\text{SO}_4^{2-}$ | Cl  | Al   | Ba   | Bi   | Ca   | Cd   | Co   | Cr   | Cu   | Fe   | K    | Mg   | Mn   | Na   | Ni   | Pb   | S    | Si   | Sr   | Zn   |
|-----------|------|--------------------|-----------------|--------------------|-----|------|------|------|------|------|------|------|------|------|------|------|------|------|------|------|------|------|------|------|
| SVA-13-2  | 31   | 0.19               | 1043            | <                  | 344 | 0.4  | <    | <    | 100  | <    | <    | <    | <    | 0.5  | 14   | 44   | 1.7  | 228  | <    | <    | 12   | <    | 0.2  | 0.9  |
| SVA-13-4  | 39   | 0.14               | 288             | <                  | 381 | 0.9  | 0.3  | <    | 94   | <    | <    | <    | <    | 0.9  | 59   | 46   | 1.7  | 248  | <    | 0.0  | 14   | <    | 0.3  | 1.3  |
| SVA-13_10 | 17   | 0.05               | 1862            | <                  | 242 | 1.1  | 0.3  | <    | 64   | <    | <    | 0.1  | <    | 2.1  | 19   | 12   | 1.3  | 139  | <    | 0.0  | 17   | <    | 0.2  | 1.2  |
| SVA-13_20 | 41   | 0.04               | 7010            | 160                | 545 | 2.1  | 0.2  | <    | 180  | 0.0  | <    | <    | <    | 2.8  | 56   | 70   | 2.0  | 376  | <    | 0.0  | 34   | <    | 0.7  | 0.7  |
| SVA-13_23 | 36   | 0.08               | <               | <                  | 332 | 1.7  | 0.8  | <    | 955  | <    | <    | 0.1  | 0.2  | 1.6  | 65   | 396  | 3.1  | 250  | 0.1  | 0.0  | 48   | 16   | 0.9  | 4.5  |
| SVA-13_31 | 51   | 0.14               | <               | <                  | 321 | 2.0  | 0.5  | <    | 2020 | <    | <    | <    | <    | 2.0  | 68   | 687  | 3.4  | 244  | 0.1  | 0.0  | 17   | <    | 2.1  | 0.6  |
| SVA-13_33 | 18   | 0.02               | 895             | <                  | 342 | 1.1  | 0.5  | <    | 69   | <    | 0.2  | <    | 0.3  | 1.1  | 27   | 12   | 9.5  | 243  | 0.1  | 0.0  | <    | 15   | 0.4  | 0.4  |
| SVA-13_36 | 20   | 0.05               | 999             | <                  | 354 | 2.1  | 0.2  | <    | 34   | <    | <    | <    | 0.2  | 4.3  | 45   | 15   | 1.9  | 259  | <    | 0.2  | <    | <    | 0.2  | 0.7  |
| SVA-13_43 | 60   | 1.21               | <               | <                  | 136 | 1.4  | 5.6  | <    | 212  | <    | 0.2  | <    | 0.2  | 2.1  | 27   | 65   | 13.0 | 90   | 0.3  | 0.1  | 50   | <    | 0.6  | 0.9  |
| SVA-13_48 | 40   | 6.08               | <               | <                  | 297 | 2.3  | 6.3  | <    | 639  | <    | 0.1  | <    | 0.1  | 2.9  | 64   | 94   | 6.1  | 172  | 0.2  | 0.0  | 30   | 17   | 0.9  | 0.4  |
| SVA-13_54 | 38   | 0.51               | <               | <                  | 158 | 1.3  | 6.0  | <    | 188  | <    | <    | <    | <    | 1.3  | 31   | 53   | 0.7  | 97   | <    | 0.0  | 61   | <    | 0.4  | 1.0  |
| SVA-13_65 | 39   | 0.71               | <               | <                  | 254 | 0.2  | 6.7  | <    | 22   | <    | <    | <    | <    | 1.6  | 20   | 7    | 0.5  | 179  | <    | 0.1  | 20   | <    | 0.4  | 0.5  |
| TAR-13_1  | 107  | 0.26               | <               | <                  | 102 | 1.0  | <    | <    | 2    | <    | <    | <    | <    | 0.4  | 47   | 2    | 0.1  | 75   | <    | <    | 12   | 11   | <    | 0.4  |
| TAR-13_5  | 170  | 0.08               | <               | <                  | <   | 1.1  | <    | <    | 2    | <    | <    | <    | <    | 0.3  | 31   | 1    | 0.0  | 40   | <    | <    | 15   | 12   | <    | 0.2  |
| TAR-13_8  | 198  | 0.05               | <               | <                  | <   | 1.6  | <    | <    | <    | <    | <    | <    | <    | 2.1  | 97   | 4    | 0.2  | 42   | <    | 0.0  | <    | 24   | <    | 0.9  |
| TAR-13_17 | 75   | 0.08               | <               | <                  | 48  | 1.3  | <    | <    | 5    | <    | <    | <    | <    | 0.9  | 34   | 2    | 0.1  | 16   | <    | 0.0  | <    | 31   | <    | 0.8  |
| TAR-13_21 | 246  | 0.10               | <               | <                  | 173 | 3.4  | 0.1  | <    | 14   | <    | <    | <    | 0.1  | 3.3  | 28   | 3    | 0.2  | 132  | <    | 0.0  | <    | <    | <    | 0.5  |
| TAR-13_24 | n.d. | n.d.               | <               | <                  | 75  | n.d. | n.d. | n.d. | n.d. | n.d. | n.d. | n.d. | n.d. | n.d. | n.d. | n.d. | n.d. | n.d. | n.d. | n.d. | n.d. | n.d. | n.d. | n.d. |
| TAR-13_27 | n.d. | n.d.               | 157             | <                  | <   | 0.8  | 5.4  | <    | 6    | <    | <    | <    | <    | 2.1  | 12   | 1    | 0.1  | 45   | <    | 0.0  | <    | 29   | 0.2  | 0.7  |
| TAR-13_28 | n.d. | n.d.               | <               | <                  | <   | n.d. | n.d. | n.d. | n.d. | n.d. | n.d. | n.d. | n.d. | n.d. | n.d. | n.d. | n.d. | n.d. | n.d. | n.d. | n.d. | n.d. | n.d. | n.d. |
| TAR-13_30 | n.d. | n.d.               | <               | <                  | 90  | 2.6  | 5.9  | <    | 127  | 0.2  | <    | <    | 0.5  | 2.7  | 66   | 5    | 0.2  | 298  | 0.5  | 0.1  | <    | 11   | 0.4  | 6.8  |
| TAR-13_32 | n.d. | n.d.               | <               | <                  | <   | 0.4  | 5.6  | <    | 4    | <    | <    | <    | <    | 0.9  | 18   | 2    | 0.1  | 22   | <    | <    | <    | <    | 0.2  | 0.5  |
| TAR-13_35 | n.d. | n.d.               | 256             | <                  | <   | 1.1  | 6.1  | <    | 12   | <    | <    | <    | <    | 0.3  | 32   | 3    | 0.2  | 45   | <    | 0.0  | <    | <    | 0.2  | 1.0  |
| TAR-13_36 | n.d. | n.d.               | <               | <                  | <   | 1.1  | 6.0  | <    | 7    | <    | <    | <    | <    | 1.2  | 38   | 3    | 0.1  | 31   | <    | 0.0  | <    | <    | 0.3  | 0.4  |
| TAR-13_37 | 303  | 0.07               | 17              | 147                | 310 | 2.6  | 1.1  | <    | 55   | <    | <    | <    | 0.4  | 2.1  | 52   | 10   | 0.3  | 190  | 0.2  | 0.1  | <    | 13   | 0.2  | 2.7  |
| TAR-13_39 | n.d. | n.d.               | <               | <                  | 83  | 0.8  | 7.1  | <    | 2    | <    | <    | <    | <    | 0.5  | 20   | 1    | 0.0  | 76   | <    | 0.0  | <    | <    | 0.2  | 0.2  |
| TAR-13_41 | 305  | 3.18               | 2351            | 149                | 554 | 7.6  | 1.8  | <    | 191  | <    | 0.1  | <    | 1.3  | 2.7  | 303  | 11   | 0.9  | 414  | 0.7  | 0.2  | 67   | 16   | 0.5  | 12.9 |
| TAR-13_42 | 107  | 0.48               | 1240            | <                  | <   | 3.5  | 0.2  | <    | 43   | <    | <    | <    | 0.2  | 1.9  | 94   | 5    | 0.4  | 44   | <    | 0.0  | <    | <    | 0.2  | 4.8  |
| MIT-12_7  | n.d. | n.d.               | 53              | 393                | 458 | 3.0  | 1.0  |      | 19   | 0    | 0    | 0    | 0    | 6    | 212  | 7    | 1    | 134  | 0    | 0    | n.d. | 24   | 0    | 1    |
| MIT-12_19 | n.d. | n.d.               | <               | <                  | 291 | 3.0  | 3.0  |      | 18   | 0    | 0    | 0    | 0    | 4    | 29   | 3    | 1    | 148  | 0    | 0    | n.d. | 22   | 0    | 3    |
| ICE-12_3  | n.d. | n.d.               | 0               | 0                  | 114 | 17   | 7    | 22   | 0    | 0    | 1    | 1    | 17   | 38   | 11   | 0    | 99   | 0    | -1   | 0    | n.d. | 40   | 0    | 25   |
| ICE-12_4  | n.d. | n.d.               | 0               | 181                | 275 | 4    | 13   | 26   | 0    | 0    | 0    | 0    | 3    | 44   | 13   | 1    | 234  | 0    | -3   | 0    | n.d. | 483  | 0    | 30   |

All values except DOC and  $\text{PO}_4^{3-}$  are given in ppb;  $\text{NO}_3^-$ ,  $\text{SO}_4^{2-}$  and Cl all determined by IC, all others analysed by ICP-MS; limit of detection (LOD, <) for IC:  $\text{NO}_3^-$  = 96 ppb, Cl = 72 ppb,  $\text{SO}_4^{2-}$  = 121 ppb, LOD's for ICP-MS: Al, Ba, Co, Cr, Cu, Fe, Mg, Ni, Si, Sr, Zn = 0.1 ppb; Bi, Cd, Mn, Pb = 0.01 ppb; Ca, Na = 1 ppb; K,P,S = 10 ppb; n.d. = not determined.

### Supplementary Table 13: Particulate composition

Total particulate carbon (TC), total nitrogen (TN), total phosphorus (TP) and total sulphur (TS) (all based on % of dry weight of solid sample) as well as the organic nitrogen and carbon isotope values from the analysed particulates in the Northern Sweden (TAR) and Svalbard (SVA) samples that contained sufficient particulate material for analyses; listed are also the solid C/N (Redfield: 6.6), C/P (Redfield: 106) and N/P (Redfield: 16) ratios calculated from the TC, TN and TP values. Iceland and Greenland samples did not contain enough particulate material for analyses.

| Sample ID | Total C [%] | Total N [%] | Total P [%] | Total S [%] | C/N   | C/P    | N/P   | $\delta^{15}\text{N}$ [‰] | $\delta^{13}\text{C}$ [‰] |
|-----------|-------------|-------------|-------------|-------------|-------|--------|-------|---------------------------|---------------------------|
| SVA-13-2  | 3.69        | 0.26        | 0.06        | 0.16        | 14.44 | 59.17  | 4.10  | -8.86                     | n.d.                      |
| SVA-13-4  | 3.05        | 0.21        | 0.06        | 0.11        | 14.89 | 51.17  | 3.44  | -6.37                     | n.d.                      |
| SVA-13_10 | 1.45        | 0.11        | 0.06        | 0.18        | 12.92 | 23.64  | 1.83  | -6.92                     | n.d.                      |
| SVA-13_20 | 1.87        | 0.19        | 0.15        | 0.07        | 10.02 | 12.44  | 1.24  | 0.27                      | -26.06                    |
| SVA-13_23 | 7.40        | 0.45        | 0.09        | 0.12        | 16.57 | 86.52  | 5.22  | -3.52                     | -28.42                    |
| SVA-13_31 | 8.85        | 0.50        | 0.08        | 0.14        | 17.70 | 111.16 | 6.28  | -2.35                     | -27.80                    |
| SVA-13_33 | 2.98        | 0.21        | 0.06        | 0.06        | 13.93 | 47.03  | 3.38  | -5.18                     | -25.00                    |
| SVA-13_36 | 6.27        | 0.36        | 0.06        | 0.10        | 17.59 | 107.07 | 6.09  | -5.37                     | n.d.                      |
| SVA-13_43 | 2.73        | 0.15        | 0.04        | 0.10        | 18.70 | 62.63  | 3.35  | -2.60                     | -27.95                    |
| SVA-13_48 | 4.90        | 0.23        | 0.06        | 0.12        | 21.06 | 79.54  | 3.78  | -6.13                     | -28.18                    |
| SVA-13_54 | 17.38       | 1.02        | n.d.        | 0.12        | 17.11 | n.d.   | n.d.  | -4.66                     | -29.43                    |
| SVA-13_65 | 4.53        | 0.27        | 0.06        | 0.10        | 16.51 | 74.75  | 4.53  | -5.52                     | -29.23                    |
| TAR-13_1  | 4.15        | 0.25        | 0.05        | 0.02        | 16.59 | 84.41  | 5.09  | -4.94                     | -25.01                    |
| TAR-13_5  | 30.04       | 1.84        | n.d.        | 0.11        | 16.32 | n.d.   | n.d.  | n.d.                      | -28.73                    |
| TAR-13_8  | 12.90       | 0.78        | n.d.        | 0.06        | 16.64 | n.d.   | n.d.  | -1.10                     | n.d.                      |
| TAR-13_17 | 19.68       | 1.11        | n.d.        | 0.10        | 17.71 | n.d.   | n.d.  | 0.37                      | -26.59                    |
| TAR-13_21 | 8.79        | 0.41        | 0.04        | 0.07        | 21.60 | 220.17 | 10.19 | -4.19                     | -21.80                    |
| TAR-13_24 | 8.61        | 0.47        | 0.05        | 0.08        | 18.17 | 165.77 | 9.12  | -5.11                     | -25.32                    |
| TAR-13_27 | 8.41        | 0.33        | 0.08        | 0.06        | 25.70 | 112.09 | 4.36  | -4.76                     | -27.74                    |
| TAR-13_28 | 12.91       | 0.57        | 0.07        | 0.07        | 22.63 | 176.06 | 7.78  | -5.49                     | -24.63                    |
| TAR-13_30 | 11.05       | 0.28        | 0.04        | 0.06        | 39.41 | 287.09 | 7.28  | -3.29                     | -24.86                    |
| TAR-13_32 | 5.07        | 0.34        | 0.07        | 0.05        | 15.02 | 75.07  | 5.00  | -5.96                     | -26.61                    |
| TAR-13_35 | 9.72        | 0.46        | 0.07        | 0.08        | 21.02 | 148.70 | 7.07  | -4.54                     | n.d.                      |
| TAR-13_36 | 25.30       | 0.90        | 0.07        | 0.09        | 28.07 | 369.73 | 13.17 | -4.95                     | n.d.                      |
| TAR-13_37 | 9.04        | 0.39        | 0.07        | 0.06        | 23.09 | 129.79 | 5.62  | -5.40                     | n.d.                      |
| TAR-13_41 | 9.61        | 0.50        | 0.03        | 0.07        | 19.13 | 275.76 | 14.42 | -6.15                     | n.d.                      |
| TAR-13_42 | 11.46       | 0.55        | 0.06        | 0.09        | 20.76 | 191.61 | 9.23  | -4.73                     | n.d.                      |

n.d. = not determined



**Supplementary Table 14: Mineralogical composition**

Geology and mineralogical composition of the Svalbard, Northern Sweden, Greenland and Iceland samples derived from X-ray diffraction analysis.

| <b>Location</b>        | <b>Geology</b>                                                           | <b>Main minerals</b>                                                                                                 |
|------------------------|--------------------------------------------------------------------------|----------------------------------------------------------------------------------------------------------------------|
| <b>Svalbard</b>        | Metamorphic and sedimentary rocks                                        | quartz, plagioclase, pyroxene, mica, chlorite, muscovite;<br>Austre Brøggerbreen and Feiringbreen: calcite, dolomite |
| <b>Northern Sweden</b> | Metamorphic rocks (gneisses, amphibolites)                               | quartz, plagioclase, hornblende, minor contributions from<br>biotite, mica and chlorite                              |
| <b>Greenland</b>       | Metamorphic (gneisses) and igneous rocks (gabbro-anorthosite intrusions) | quartz, plagioclase, smectite, mica, hornblende and chlorite                                                         |
| <b>Iceland</b>         | Igneous rocks (basalt)                                                   | quartz, plagioclase, pyroxene, minor contributions from<br>clays, basaltic glass and hematite                        |

## Supplementary References

- 1 Lutz, S., Anesio, A. M., Villar, S. E. J. & Benning, L. G. Variations of algal communities cause darkening of a Greenland glacier. *FEMS microbiology ecology* **89**, 402-414 (2014).
- 2 Lutz, S., Anesio, A. M., Edwards, A. & Benning, L. G. Microbial diversity on Icelandic glaciers and ice caps. *Frontiers in microbiology* **6**, 307 (2015).
- 3 Stibal, M. *et al.* Microbial abundance in surface ice on the Greenland Ice Sheet. *Frontiers in microbiology* **6** (2015).
- 4 Spijkerman, E., Wacker, A., Weithoff, G. & Leya, T. Elemental and fatty acid composition of snow algae in Arctic habitats. *Frontiers in microbiology* **3** (2012).
- 5 Prasad, S. *et al.* *Arcticibacter svalbardensis* gen. nov., sp. nov., of the family Sphingobacteriaceae in the phylum Bacteroidetes, isolated from Arctic soil. *International Journal of Systematic and Evolutionary Microbiology* **63**, 1627-1632 (2013).
